# Supplementary material for: TaSPL14-7A is a conserved regulator controlling plant architecture and yield traits in common wheat (Triticum aestivum L.)
Source: PubMed Central journal article supplement (PMC10113487; doi:10.3389/fpls.2023.1178624), 2023-04-05
Supplement: DataSheet_1.pdf [file DataSheet_1.pdf]

## Supplementary Material

### 1 Supplementary Figures and Tables

#### 1.1 Supplementary Figures

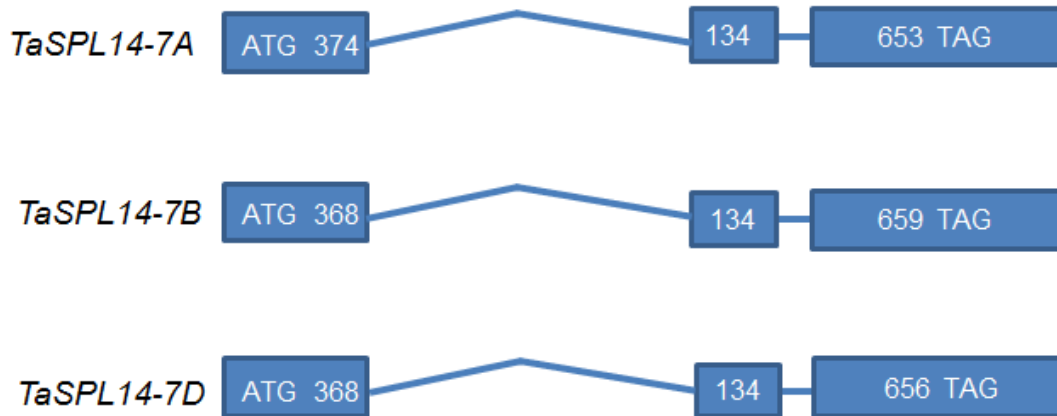

**Supplementary Figure 1.** Gene structures of the *TaSPL14* homoeologs. The blue rectangles represent exons, the lines between exons represent introns, and the number indicates the length of exons in base pairs.

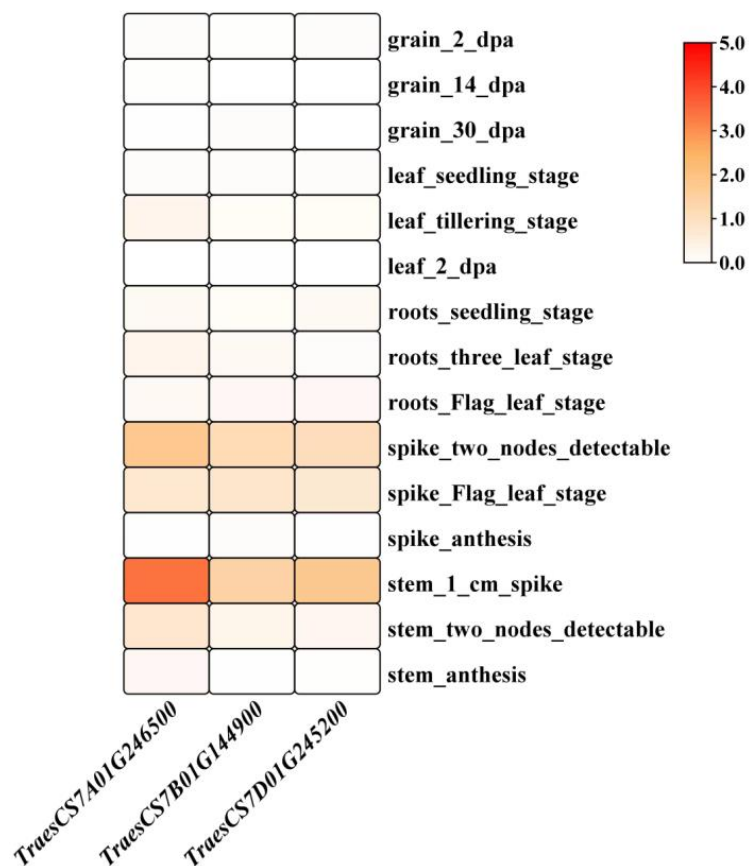

**Supplementary Figure 2.** Heat map of expression profiles of *TaSPL14* homoeologs. The tissue expression data of *TaSPL14* homoeologs are obtained from the wheat expression database (<http://www.wheat-expression.com/>). Expression levels of *TaSPL14* homoeologs are presented according to the color scale, in which red color and white color represent high and low transcript abundance respectively. *TaSPL14-7A*, *TraesCS7A02G246500*; *TaSPL14-7B*, *TraesCS7B02G144900*; *TaSPL14-7D*, *TraesCS7D02G245200*.

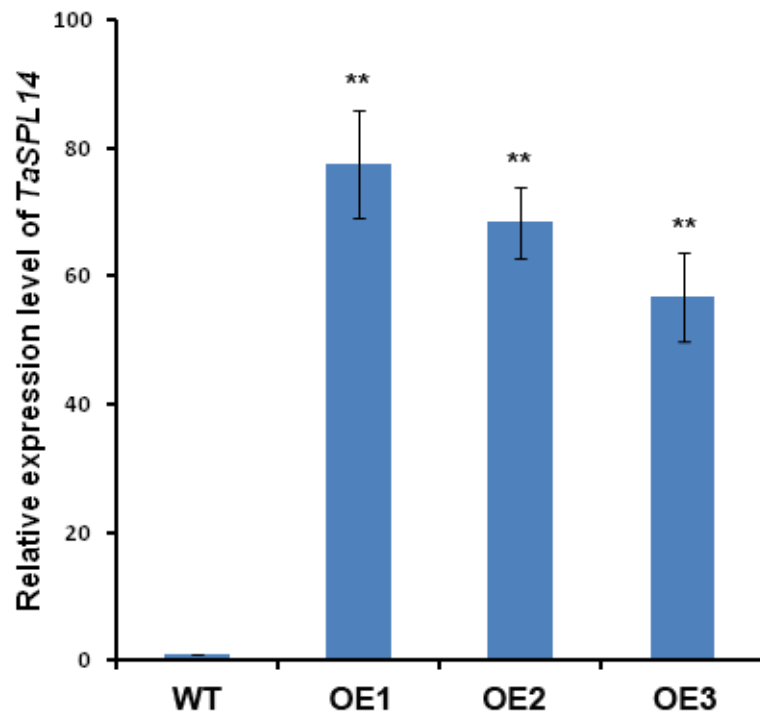

**Supplementary Figure 3.** Relative expression level of *TaSPL14* in seedling leaves of wild type (WT) and three representative T<sub>3</sub> generation overexpression (OE) lines (OE-1–3). The values are presented as mean  $\pm$  SD. \*\* $P < 0.01$  (ANOVA) indicates a significant difference to the WT.

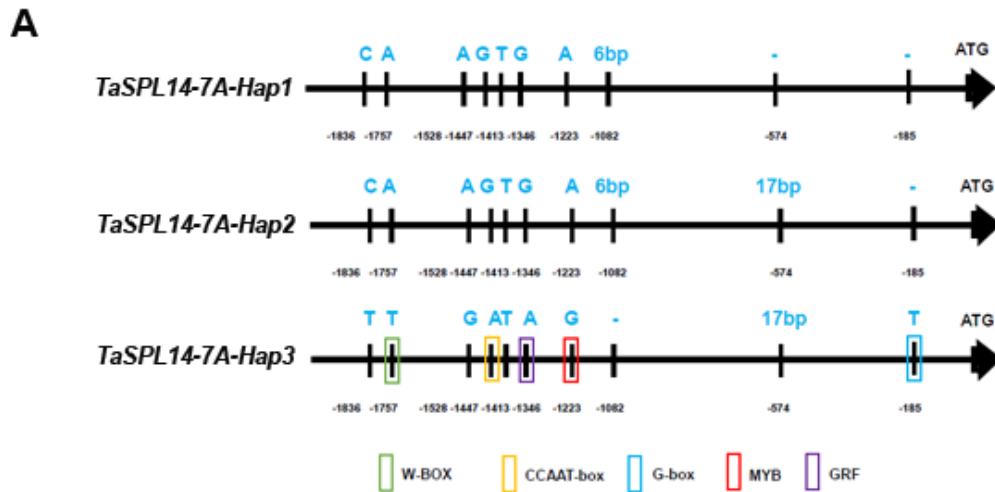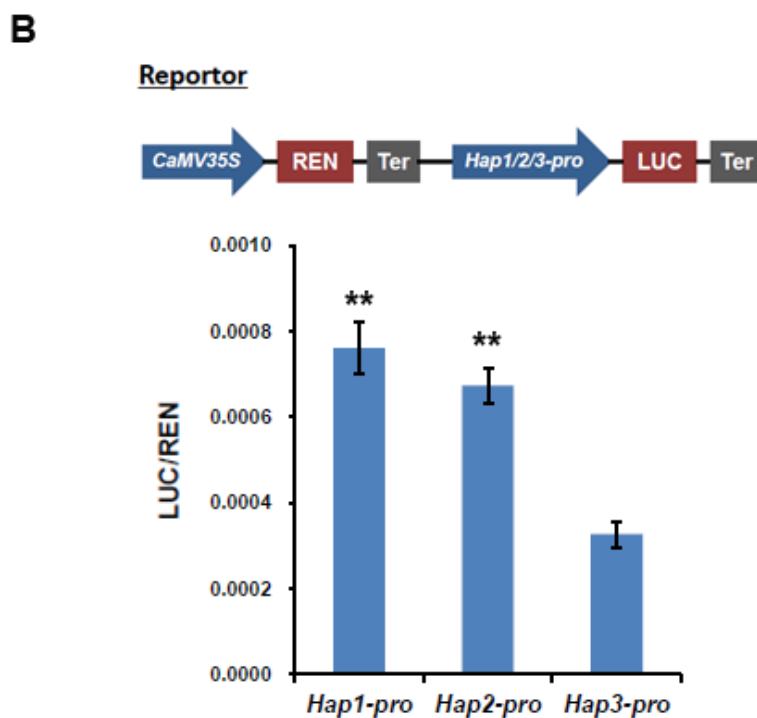

**Supplementary Figure 4.** Cis-elements prediction and promoter activity analysis of *TaSPL14-7A* haplotypes. (A) Predicted cis-elements in the promoter regions of *TaSPL14-7A*. Three haplotypes are formed by 7 SNPs and 2 InDels in the *TaSPL14-7A* promoter regions. Different cis-elements are shown in boxes with different colors. W-Box (TTGACY): WRKY transcription factor binding motif; CCAAT-box (CCAAT): CCAAT transcription factor binding motif; G-box (CTGGTC): light responsive element; MYB (AGCGG): MYB transcription factor binding motif; GRF (TTTTCAGA): GRF transcription factor binding motif. (B) Promoter activity assays of *TaSPL14-7A* haplotypes. The promoter of each haplotype is cloned into the pGreenII 0800-LUC vector, and the promoter activity is measured according to the LUC/REN ratio. The values are presented as mean  $\pm$  SD. \*\*  $P < 0.01$  (ANOVA) indicates a significant difference to the *Hap3-pro*.

## 1.2 Supplementary Tables

### **Supplementary Table 1.** Primers used in this study.

---

#### Primers used for gene cloning and vector construction (5'-3')

---

|              |                                               |
|--------------|-----------------------------------------------|
| TaSPL14-OE-F | GTCGACTCTAGAGGATCCATGGAGATTGGAAGCGG           |
| TaSPL14-OE-R | GCTCTCTAGA <u>ACTAGT</u> CTACAGAGACCAGTTGGACG |

---

#### Primers used for qRT-PCR (5'-3')

---

|                  |                       |
|------------------|-----------------------|
| TaSPL14-7A-qRT-F | TCGCTGCATCCTTTGAAGAA  |
| TaSPL14-7A-qRT-R | CTTGCCACTGGATTTCACCA  |
| TaSPL14-7B-qRT-F | TCGCTGCATCCTTTGAAGAA  |
| TaSPL14-7B-qRT-R | TGAGGACGCAGGTCTAGGTTC |
| TaSPL14-7D-qRT-F | TCGCTGCATCCTTTGAAGAA  |
| TaSPL14-7D-qRT-R | TTGGAGGGAGCTCTGGGC    |
| TaActin-F        | AGGTGCCCTGAGGTGCTGTT  |
| TaActin-R        | GCCAAAATAGAGCCACCGAT  |

---

#### Primers used for molecular marker development

---

##### **CAPS144**

|               |                     |
|---------------|---------------------|
| TaSPL14-A-F1  | GCCGCACGGCAGAGGAT   |
| TaSPL14-A-R1  | GAAGCGGAAGGCCCCAC   |
| TaSPL14- A-F2 | CAGCAAGCAGGCAAGAGCA |
| TaSPL14-A-R2  | GCGGGGCTCCTTGGTGTGC |

##### **CAPS4111**

|               |                        |
|---------------|------------------------|
| TaSPL14 A-F3  | TGTATTCCAAACTCTACTGAAA |
| TaSPL14-A-R3  | GGTGTGCTTGTGGTCTCTTAA  |
| TaSPL14- A-F4 | TCCCTCCAGGTGGGTGTCT    |
| TaSPL14-A-R4  | GCACCTCGTGGAGCTGGAC    |

---

**Supplementary Table 2.** The 36 wheat accessions used for polymorphism discovery.

| Number | Accession         | Haplotype              | Variety type    |
|--------|-------------------|------------------------|-----------------|
| 1      | Dingxingzhai      | <i>TaSPL14-7A-Hap2</i> | Landrace        |
| 2      | Hongpidongmai     | <i>TaSPL14-7A-Hap3</i> | Landrace        |
| 3      | Sanyuehuang       | <i>TaSPL14-7A-Hap3</i> | Landrace        |
| 4      | Baihuamai         | <i>TaSPL14-7A-Hap3</i> | Landrace        |
| 5      | Huomai            | <i>TaSPL14-7A-Hap3</i> | Landrace        |
| 6      | Biantouguangkemai | <i>TaSPL14-7A-Hap3</i> | Landrace        |
| 7      | Shanxibaimai      | <i>TaSPL14-7A-Hap3</i> | Landrace        |
| 8      | Baimazha          | <i>TaSPL14-7A-Hap3</i> | Landrace        |
| 9      | Baimangmai        | <i>TaSPL14-7A-Hap3</i> | Landrace        |
| 10     | Zhumaoyuanzitou   | <i>TaSPL14-7A-Hap3</i> | Landrace        |
| 11     | Hongmangzi        | <i>TaSPL14-7A-Hap2</i> | Landrace        |
| 12     | Chanbuzhi         | <i>TaSPL14-7A-Hap3</i> | Landrace        |
| 13     | Wangshuibai       | <i>TaSPL14-7A-Hap3</i> | Landrace        |
| 14     | Dabaimai          | <i>TaSPL14-7A-Hap3</i> | Landrace        |
| 15     | Dalibanmang       | <i>TaSPL14-7A-Hap3</i> | Landrace        |
| 16     | Jinhuangmai       | <i>TaSPL14-7A-Hap2</i> | Landrace        |
| 17     | Zijiehong         | <i>TaSPL14-7A-Hap2</i> | Landrace        |
| 18     | Xiaobaimang       | <i>TaSPL14-7A-Hap2</i> | Landrace        |
| 19     | Dahongmai         | <i>TaSPL14-7A-Hap1</i> | Landrace        |
| 20     | Sankecun          | <i>TaSPL14-7A-Hap2</i> | Landrace        |
| 21     | Dabaipi           | <i>TaSPL14-7A-Hap1</i> | Landrace        |
| 22     | Honglidangnianlao | <i>TaSPL14-7A-Hap1</i> | Landrace        |
| 23     | Paozimai          | <i>TaSPL14-7A-Hap2</i> | Landrace        |
| 24     | jinyang 60        | <i>TaSPL14-7A-Hap3</i> | Modern cultivar |
| 25     | Fuzhuang 30       | <i>TaSPL14-7A-Hap3</i> | Modern cultivar |
| 26     | Xinong 6028       | <i>TaSPL14-7A-Hap3</i> | Modern cultivar |
| 27     | Shite14           | <i>TaSPL14-7A-Hap1</i> | Modern cultivar |
| 28     | Zhemai 1          | <i>TaSPL14-7A-Hap3</i> | Modern cultivar |
| 29     | Huzhuhong         | <i>TaSPL14-7A-Hap2</i> | Modern cultivar |
| 30     | Mingxian169       | <i>TaSPL14-7A-Hap3</i> | Modern cultivar |
| 31     | Dingxi24          | <i>TaSPL14-7A-Hap1</i> | Modern cultivar |
| 32     | Nongda 139        | <i>TaSPL14-7A-Hap2</i> | Modern cultivar |
| 33     | Shijiazhuang 54   | <i>TaSPL14-7A-Hap1</i> | Modern cultivar |
| 34     | Zhongyou 9507     | <i>TaSPL14-7A-Hap2</i> | Modern cultivar |
| 35     | Jinghong 5        | <i>TaSPL14-7A-Hap1</i> | Modern cultivar |
| 36     | Lumai1            | <i>TaSPL14-7A-Hap1</i> | Modern cultivar |

**Supplementary Table 3.** The 15 wheat accessions used for differential expression analysis of *TaSPL14-7A* haplotypes.

| Number | Accession    | Haplotype              | Variety type    |
|--------|--------------|------------------------|-----------------|
| 1      | Huoliaomai   | <i>TaSPL14-7A-Hap1</i> | Landrace        |
| 2      | Dahongmai    | <i>TaSPL14-7A-Hap1</i> | Landrace        |
| 3      | Baiyoumai    | <i>TaSPL14-7A-Hap1</i> | Landrace        |
| 4      | Yangmai      | <i>TaSPL14-7A-Hap1</i> | Landrace        |
| 5      | Dongnong 101 | <i>TaSPL14-7A-Hap1</i> | Modern cultivar |
| 6      | Neimai 11    | <i>TaSPL14-7A-Hap2</i> | Modern cultivar |
| 7      | Xiaohongpi   | <i>TaSPL14-7A-Hap2</i> | Landrace        |
| 8      | Bihongsui    | <i>TaSPL14-7A-Hap2</i> | Modern cultivar |
| 9      | Ganmai 46    | <i>TaSPL14-7A-Hap2</i> | Modern cultivar |
| 10     | Jinchun 3    | <i>TaSPL14-7A-Hap2</i> | Modern cultivar |
| 11     | Ganmai 6     | <i>TaSPL14-7A-Hap3</i> | Modern cultivar |
| 12     | Xiangnong 3  | <i>TaSPL14-7A-Hap3</i> | Modern cultivar |
| 13     | Xiaobaimai   | <i>TaSPL14-7A-Hap3</i> | Landrace        |
| 14     | Xinkehan 9   | <i>TaSPL14-7A-Hap3</i> | Modern cultivar |
| 15     | Lianglaiyou  | <i>TaSPL14-7A-Hap3</i> | Modern cultivar |

**Supplementary Table 4.** Genotypes of 157 landraces and 348 modern cultivars in Chinese wheat core collections.

| Number           | Accession          | <i>TaSPL14-7A</i><br>haplotype | Agro-ecological<br>zones |
|------------------|--------------------|--------------------------------|--------------------------|
| <b>Landraces</b> |                    |                                |                          |
| 1                | Xiaobaimai         | <i>Hap2</i>                    | VII                      |
| 2                | Hongpixiaomai      | <i>Hap2</i>                    | VII                      |
| 3                | Dabaipi            | <i>Hap1</i>                    | VII                      |
| 4                | Xiaohongpi         | <i>Hap2</i>                    | VII                      |
| 5                | Dingxingzhai       | <i>Hap2</i>                    | VII                      |
| 6                | Honglidangnianlao  | <i>Hap2</i>                    | VII                      |
| 7                | Chunxiaomai        | <i>Hap2</i>                    | VII                      |
| 8                | Huoliaomai         | <i>Hap1</i>                    | VII                      |
| 9                | Dahongmai          | <i>Hap1</i>                    | VII                      |
| 10               | Shanxibaimai       | <i>Hap3</i>                    | I                        |
| 11               | Niuzhijia          | <i>Hap3</i>                    | I                        |
| 12               | Mahuaban           | <i>Hap3</i>                    | I                        |
| 13               | Jiahongmai         | <i>Hap3</i>                    | I                        |
| 14               | Hongjinmai         | <i>Hap3</i>                    | I                        |
| 15               | Baiqimai           | <i>Hap3</i>                    | I                        |
| 16               | Xiaokouhong        | <i>Hap3</i>                    | I                        |
| 17               | Lanhuamai          | <i>Hap3</i>                    | I                        |
| 18               | Daimanghongmai     | <i>Hap3</i>                    | I                        |
| 19               | Zhuoludongmai      | <i>Hap2</i>                    | I                        |
| 20               | Hongmai            | <i>Hap3</i>                    | I                        |
| 21               | Honglaomai         | <i>Hap2</i>                    | I                        |
| 22               | Youmangbaifu       | <i>Hap3</i>                    | I                        |
| 23               | Hongpidongmai      | <i>Hap3</i>                    | I                        |
| 24               | Panshiwumang       | <i>Hap3</i>                    | I                        |
| 25               | Youmangbaifu       | <i>Hap3</i>                    | I                        |
| 26               | Baiqiumai          | <i>Hap3</i>                    | I                        |
| 27               | Laomai             | <i>Hap2</i>                    | I                        |
| 28               | Xiaobaimang        | <i>Hap2</i>                    | I                        |
| 29               | Xianmai            | <i>Hap3</i>                    | III                      |
| 30               | Jiangxizao         | <i>Hap3</i>                    | III                      |
| 31               | Honghuazao         | <i>Hap3</i>                    | III                      |
| 32               | Jiangdongmen       | <i>Hap3</i>                    | III                      |
| 33               | Dahuangpi          | <i>Hap2</i>                    | III                      |
| 34               | Chongyanghongmai 1 | <i>Hap3</i>                    | III                      |
| 35               | Zaowutian          | <i>Hap3</i>                    | III                      |
| 36               | Liuzhutou          | <i>Hap3</i>                    | III                      |
| 37               | Chanbuzhi          | <i>Hap3</i>                    | III                      |
| 38               | Zhumaoyuanzitou    | <i>Hap3</i>                    | III                      |
| 39               | Shuilizhan         | <i>Hap3</i>                    | III                      |



|    |                 |             |     |
|----|-----------------|-------------|-----|
| 40 | Huangshuibai    | <i>Hap3</i> | III |
| 41 | Baipu           | <i>Hap3</i> | III |
| 42 | Zaoxiaomai      | <i>Hap3</i> | III |
| 43 | Lanxizaoxiaomai | <i>Hap3</i> | III |
| 44 | Wangshuibai     | <i>Hap3</i> | III |
| 45 | Wuyuanmai       | <i>Hap3</i> | III |
| 46 | Chejianzi       | <i>Hap3</i> | III |
| 47 | Heshangmai      | <i>Hap3</i> | III |
| 48 | Nuomai          | <i>Hap3</i> | III |
| 49 | Mangxiaomai     | <i>Hap3</i> | III |
| 50 | Sankecun        | <i>Hap2</i> | III |
| 51 | Paozimai        | <i>Hap2</i> | III |
| 52 | Baiyoumai       | <i>Hap1</i> | VI  |
| 53 | Yangmai         | <i>Hap1</i> | VI  |
| 54 | Donghuachunmai  | <i>Hap3</i> | VI  |
| 55 | Huoqiu          | <i>Hap2</i> | VI  |
| 56 | Daqingmang      | <i>Hap2</i> | VI  |
| 57 | Guangtou        | <i>Hap2</i> | VI  |
| 58 | Chaoanxiaomai   | <i>Hap3</i> | V   |
| 59 | Chike           | <i>Hap3</i> | V   |
| 60 | Songruimai      | <i>Hap3</i> | V   |
| 61 | Shengen         | <i>Hap3</i> | V   |
| 62 | Shanglinxiaomai | <i>Hap3</i> | V   |
| 63 | Baimangmai      | <i>Hap3</i> | II  |
| 64 | Huangguaxian    | <i>Hap3</i> | II  |
| 65 | Banjiemang      | <i>Hap3</i> | II  |
| 66 | Laolaixia       | <i>Hap3</i> | II  |
| 67 | Louguding       | <i>Hap3</i> | II  |
| 68 | Xishanbiansui   | <i>Hap3</i> | II  |
| 69 | Honggoudou      | <i>Hap3</i> | II  |
| 70 | Baihuomai       | <i>Hap3</i> | II  |
| 71 | Sanyuehuang     | <i>Hap3</i> | II  |
| 72 | Hongqiangchang  | <i>Hap3</i> | II  |
| 73 | Youzimai        | <i>Hap1</i> | II  |
| 74 | Pingyuan 50     | <i>Hap1</i> | II  |
| 75 | Baibiansui      | <i>Hap1</i> | II  |
| 76 | Baiqimai        | <i>Hap3</i> | II  |
| 77 | Baituzitou      | <i>Hap3</i> | II  |
| 78 | Youmangsaogudan | <i>Hap3</i> | II  |
| 79 | Buyanghong      | <i>Hap3</i> | II  |
| 80 | Mazhamai        | <i>Hap3</i> | II  |
| 81 | Qiangchangmai   | <i>Hap1</i> | II  |
| 82 | Huomai          | <i>Hap3</i> | II  |
| 83 | Meiqianwu       | <i>Hap3</i> | II  |

|     |                    |             |      |
|-----|--------------------|-------------|------|
| 84  | Jiangmai           | <i>Hap3</i> | II   |
| 85  | Sanyuehuang        | <i>Hap3</i> | II   |
| 86  | Xiaofoshou         | <i>Hap1</i> | II   |
| 87  | Hongheshangtou     | <i>Hap3</i> | II   |
| 88  | Dakoumai           | <i>Hap3</i> | II   |
| 89  | Tumangmai          | <i>Hap3</i> | II   |
| 90  | Baitiaoyu          | <i>Hap3</i> | II   |
| 91  | Baimangmai         | <i>Hap3</i> | II   |
| 92  | Dayuhua            | <i>Hap3</i> | II   |
| 93  | Fumai              | <i>Hap1</i> | II   |
| 94  | Laoqimai           | <i>Hap1</i> | II   |
| 95  | Chushanbao         | <i>Hap3</i> | II   |
| 96  | Zijiehong          | <i>Hap2</i> | II   |
| 97  | Dalibanmang        | <i>Hap3</i> | II   |
| 98  | Liuyuehuang        | <i>Hap2</i> | IX   |
| 99  | Gejiaxiang         | <i>Hap2</i> | IX   |
| 100 | Geerhongmai        | <i>Hap2</i> | IX   |
| 101 | Dachunbaisilengmai | <i>Hap2</i> | IX   |
| 102 | Bailanghuimai      | <i>Hap3</i> | IX   |
| 103 | Bendihuanghuamai   | <i>Hap2</i> | IX   |
| 104 | Zhahong            | <i>Hap2</i> | IX   |
| 105 | Motuoxiaomai       | <i>Hap3</i> | IX   |
| 106 | Bianbachunmai 6    | <i>Hap3</i> | IX   |
| 107 | Baimangxiaomai     | <i>Hap3</i> | IX   |
| 108 | Wujiangzhuo        | <i>Hap2</i> | IX   |
| 109 | Muzongzhuoga       | <i>Hap2</i> | IX   |
| 110 | Kangdingxiaomai    | <i>Hap2</i> | IX   |
| 111 | Shanmai            | <i>Hap2</i> | VIII |
| 112 | Yizhimai           | <i>Hap3</i> | VIII |
| 113 | Dabaimai           | <i>Hap3</i> | VIII |
| 114 | Galaohan           | <i>Hap2</i> | VIII |
| 115 | Huoliyan           | <i>Hap2</i> | VIII |
| 116 | Shanmai            | <i>Hap2</i> | VIII |
| 117 | Hongtuzi           | <i>Hap2</i> | VIII |
| 118 | Baidatou           | <i>Hap2</i> | VIII |
| 119 | Huangjinmai        | <i>Hap2</i> | VIII |
| 120 | Hongmangmai        | <i>Hap2</i> | VIII |
| 121 | Dabaimai           | <i>Hap2</i> | VIII |
| 122 | Baiqitou           | <i>Hap2</i> | VIII |
| 123 | Baimazha           | <i>Hap3</i> | VIII |
| 124 | Laotutou           | <i>Hap2</i> | VIII |
| 125 | Tongjiabaxiaomai   | <i>Hap3</i> | IV   |
| 126 | Honghuamai         | <i>Hap3</i> | IV   |
| 127 | Baimaizi           | <i>Hap3</i> | IV   |

|     |                     |             |    |
|-----|---------------------|-------------|----|
| 128 | Chengduguangtou     | <i>Hap3</i> | IV |
| 129 | Jiangmai            | <i>Hap3</i> | IV |
| 130 | Baihuamai           | <i>Hap3</i> | IV |
| 131 | Huanxiangguo        | <i>Hap3</i> | IV |
| 132 | Hanzhongbai         | <i>Hap3</i> | IV |
| 133 | Xiaosanyuehuang     | <i>Hap3</i> | IV |
| 134 | Suotiaohongmai      | <i>Hap3</i> | IV |
| 135 | Hongxumai           | <i>Hap3</i> | IV |
| 136 | Zipi                | <i>Hap3</i> | IV |
| 137 | Baimangmai          | <i>Hap3</i> | IV |
| 138 | Hongmangzi          | <i>Hap2</i> | IV |
| 139 | Yuqiumai            | <i>Hap1</i> | IV |
| 140 | Yangmai             | <i>Hap2</i> | IV |
| 141 | Yangmai             | <i>Hap2</i> | IV |
| 142 | Zhushimai           | <i>Hap2</i> | IV |
| 143 | biantouguangkemai   | <i>Hap3</i> | IV |
| 144 | Changmangshibiantou | <i>Hap3</i> | IV |
| 145 | Zhugoumai           | <i>Hap2</i> | IV |
| 146 | Dianxihongkeyangmai | <i>Hap3</i> | IV |
| 147 | Baidongmai          | <i>Hap3</i> | X  |
| 148 | Hongchunmai         | <i>Hap1</i> | X  |
| 149 | Chunmai             | <i>Hap2</i> | X  |
| 150 | Hongdongmai         | <i>Hap1</i> | X  |
| 151 | Hongdongmai         | <i>Hap2</i> | X  |
| 152 | Wumangchunmai       | <i>Hap2</i> | X  |
| 153 | Hongchunmai         | <i>Hap1</i> | X  |
| 154 | Hongjinbaoyin       | <i>Hap2</i> | X  |
| 155 | Hongdongmai         | <i>Hap2</i> | X  |
| 156 | Wumangchunmai       | <i>Hap2</i> | X  |
| 157 | Zhongguochun        | <i>Hap3</i> | IV |

---

**Modern cultivars**

|    |                |             |   |
|----|----------------|-------------|---|
| 1  | Dingxian 72    | <i>Hap3</i> | I |
| 2  | Huabei 672     | <i>Hap2</i> | I |
| 3  | Beijing 8      | <i>Hap2</i> | I |
| 4  | Beijing 15     | <i>Hap3</i> | I |
| 5  | Nongda 139     | <i>Hap2</i> | I |
| 6  | Nongda 183     | <i>Hap2</i> | I |
| 7  | Nongda 311     | <i>Hap2</i> | I |
| 8  | Dongfanghong 3 | <i>Hap2</i> | I |
| 9  | Keyi 23        | <i>Hap3</i> | I |
| 10 | Jingnong 94-32 | <i>Hap2</i> | I |
| 11 | Jingnong 81-49 | <i>Hap2</i> | I |
| 12 | Jinghua 1      | <i>Hap2</i> | I |
| 13 | Beinongda BL8  | <i>Hap2</i> | I |

|    |                    |             |    |
|----|--------------------|-------------|----|
| 14 | Hebuyu 6068        | <i>Hap1</i> | I  |
| 15 | Jinghe 91-P19      | <i>Hap2</i> | I  |
| 16 | Jingnong 86-89     | <i>Hap2</i> | I  |
| 17 | Kecheng 1          | <i>Hap2</i> | I  |
| 18 | Xiaoshan 8         | <i>Hap2</i> | I  |
| 19 | Jingpin 12         | <i>Hap1</i> | I  |
| 20 | Pindong 904110-3   | <i>Hap1</i> | I  |
| 21 | Pinkang 244        | <i>Hap2</i> | I  |
| 22 | Yuandong 821       | <i>Hap2</i> | I  |
| 23 | Yuandong 822       | <i>Hap1</i> | I  |
| 24 | Fengkang 2         | <i>Hap2</i> | I  |
| 25 | Fengkang 8         | <i>Hap2</i> | I  |
| 26 | An 85 Zhong 124-1  | <i>Hap2</i> | I  |
| 27 | Qiaoliang BW41     | <i>Hap3</i> | I  |
| 28 | Zhongda 89-60192-2 | <i>Hap2</i> | I  |
| 29 | Beijing 8694       | <i>Hap2</i> | I  |
| 30 | Zhongyou 9507      | <i>Hap2</i> | I  |
| 31 | Lang 8302          | <i>Hap2</i> | I  |
| 32 | Jimai 17           | <i>Hap2</i> | I  |
| 33 | Tang 85-5032       | <i>Hap2</i> | I  |
| 34 | Tang 78042         | <i>Hap2</i> | I  |
| 35 | Henong 3           | <i>Hap2</i> | I  |
| 36 | Taifu 1            | <i>Hap2</i> | I  |
| 37 | Jinmai 8           | <i>Hap2</i> | I  |
| 38 | Jinmai 16          | <i>Hap2</i> | I  |
| 39 | Jinmai 31          | <i>Hap2</i> | I  |
| 40 | Jin 3052-5         | <i>Hap2</i> | I  |
| 41 | Jinzhong 103       | <i>Hap2</i> | I  |
| 42 | Changzhi 5557      | <i>Hap2</i> | I  |
| 43 | Changzhi 6406      | <i>Hap3</i> | I  |
| 44 | Lvhan 328          | <i>Hap3</i> | I  |
| 45 | Jinmai 11          | <i>Hap2</i> | I  |
| 46 | Taiyuan 351        | <i>Hap2</i> | I  |
| 47 | Jin 1410           | <i>Hap1</i> | I  |
| 48 | Mingxian 169       | <i>Hap3</i> | I  |
| 49 | Gongnong 4         | <i>Hap3</i> | I  |
| 50 | Taiyuan 2112       | <i>Hap2</i> | I  |
| 51 | Yanan 11           | <i>Hap2</i> | I  |
| 52 | Yanan 18           | <i>Hap2</i> | I  |
| 53 | Pingliang 30       | <i>Hap3</i> | I  |
| 54 | Xifeng 16          | <i>Hap2</i> | I  |
| 55 | Pingliang 32       | <i>Hap2</i> | I  |
| 56 | Qingshui 15-41(2)  | <i>Hap3</i> | I  |
| 57 | Shite 14           | <i>Hap1</i> | II |

|     |                  |             |    |
|-----|------------------|-------------|----|
| 58  | Shijiazhuang 407 | <i>Hap2</i> | II |
| 59  | Shijiazhuang 4   | <i>Hap2</i> | II |
| 60  | Shijiazhuang 34  | <i>Hap2</i> | II |
| 61  | Shijiazhuang 54  | <i>Hap1</i> | II |
| 62  | Zaoxinshi        | <i>Hap2</i> | II |
| 63  | Pin 39           | <i>Hap2</i> | II |
| 64  | Jimai 23         | <i>Hap1</i> | II |
| 65  | Shi 82-5201      | <i>Hap1</i> | II |
| 66  | Cangzhou 1       | <i>Hap2</i> | II |
| 67  | 12040            | <i>Hap2</i> | II |
| 68  | Hengshui 7004    | <i>Hap2</i> | II |
| 69  | Hengdalihong     | <i>Hap1</i> | II |
| 70  | Ji 93C6 156-2    | <i>Hap2</i> | II |
| 71  | Jimai 20         | <i>Hap2</i> | II |
| 72  | Gaobi-13         | <i>Hap1</i> | II |
| 73  | Jimai 14         | <i>Hap2</i> | II |
| 74  | Jimai 19         | <i>Hap2</i> | II |
| 75  | Jishi 5032       | <i>Hap1</i> | II |
| 76  | Han 4564         | <i>Hap2</i> | II |
| 77  | 1817             | <i>Hap3</i> | II |
| 78  | Maijin 1         | <i>Hap3</i> | II |
| 79  | Jinyang 1045     | <i>Hap2</i> | II |
| 80  | Jinmai 20        | <i>Hap2</i> | II |
| 81  | Jin 865096       | <i>Hap2</i> | II |
| 82  | Jinmai 37        | <i>Hap2</i> | II |
| 83  | Linyuan 129      | <i>Hap1</i> | II |
| 84  | Pingyang 27      | <i>Hap1</i> | II |
| 85  | Qida 195         | <i>Hap2</i> | II |
| 86  | Jinan 2          | <i>Hap2</i> | II |
| 87  | Jinan 9          | <i>Hap2</i> | II |
| 88  | Youbao           | <i>Hap2</i> | II |
| 89  | Huangtai 103     | <i>Hap1</i> | II |
| 90  | Taishan 1        | <i>Hap2</i> | II |
| 91  | Taishan 4        | <i>Hap2</i> | II |
| 92  | Jinan 17         | <i>Hap1</i> | II |
| 93  | Lumai 22         | <i>Hap2</i> | II |
| 94  | Jimai 19         | <i>Hap2</i> | II |
| 95  | Lumai 10         | <i>Hap3</i> | II |
| 96  | Lainongpinxi 22  | <i>Hap2</i> | II |
| 97  | Laizhou 953      | <i>Hap2</i> | II |
| 98  | Lumai 1          | <i>Hap1</i> | II |
| 99  | Lumai 5          | <i>Hap2</i> | II |
| 100 | Shannong PH85-4  | <i>Hap2</i> | II |
| 101 | Lunong 784081    | <i>Hap2</i> | II |

|     |                          |             |    |
|-----|--------------------------|-------------|----|
| 102 | Lunong 86(5)174          | <i>Hap1</i> | II |
| 103 | Luzi 0863169             | <i>Hap2</i> | II |
| 104 | Luzi 0884142             | <i>Hap2</i> | II |
| 105 | Taishan 7                | <i>Hap1</i> | II |
| 106 | Teng 80-1-2              | <i>Hap2</i> | II |
| 107 | Changwei 20              | <i>Hap2</i> | II |
| 108 | Yanzhong 144             | <i>Hap3</i> | II |
| 109 | Yannong 3                | <i>Hap2</i> | II |
| 110 | Yannong 15               | <i>Hap1</i> | II |
| 111 | Lumai 7                  | <i>Hap1</i> | II |
| 112 | Lumai 9                  | <i>Hap2</i> | II |
| 113 | Neixiang 5               | <i>Hap1</i> | II |
| 114 | Anxuan 2                 | <i>Hap3</i> | II |
| 115 | Zhengzhou 6              | <i>Hap3</i> | II |
| 116 | Bonong 7023              | <i>Hap2</i> | II |
| 117 | Mengxian 2               | <i>Hap2</i> | II |
| 118 | Wan 7107                 | <i>Hap1</i> | II |
| 119 | Yumai 18                 | <i>Hap1</i> | II |
| 120 | Yumai 54                 | <i>Hap1</i> | II |
| 121 | Bainong 3217             | <i>Hap2</i> | II |
| 122 | Yumai 2                  | <i>Hap2</i> | II |
| 123 | Lankao 906               | <i>Hap2</i> | II |
| 124 | Yuanzhu 55               | <i>Hap3</i> | II |
| 125 | Zhengzhou 8761           | <i>Hap2</i> | II |
| 126 | Yumai 14                 | <i>Hap3</i> | II |
| 127 | Zhengzhou 4              | <i>Hap2</i> | II |
| 128 | Yu 7106-0-22-1-3-2B      | <i>Hap1</i> | II |
| 129 | Zhengzhou 741            | <i>Hap2</i> | II |
| 130 | Hua 852895-2             | <i>Hap2</i> | II |
| 131 | Yu 30691-1-3             | <i>Hap1</i> | II |
| 132 | Zheng 87305-0-13         | <i>Hap1</i> | II |
| 133 | Zhengzi R84019-0-7-4-0-1 | <i>Hap1</i> | II |
| 134 | Wenmai 6                 | <i>Hap2</i> | II |
| 135 | Yumai 7                  | <i>Hap2</i> | II |
| 136 | Anmai 95 Zhong 35        | <i>Hap2</i> | II |
| 137 | Jingyang 60              | <i>Hap3</i> | II |
| 138 | Bima 1                   | <i>Hap1</i> | II |
| 139 | Bima 4                   | <i>Hap3</i> | II |
| 140 | Shannong 9               | <i>Hap3</i> | II |
| 141 | Xinong 6028              | <i>Hap3</i> | II |
| 142 | Fengchan 3               | <i>Hap3</i> | II |
| 143 | Jinguangmai              | <i>Hap3</i> | II |
| 144 | Aifeng 3                 | <i>Hap1</i> | II |
| 145 | Xiaoyan 4                | <i>Hap3</i> | II |

|     |                    |             |     |
|-----|--------------------|-------------|-----|
| 146 | Jingyang 30        | <i>Hap3</i> | II  |
| 147 | Baomai 3           | <i>Hap2</i> | II  |
| 148 | Baomai 5           | <i>Hap1</i> | II  |
| 149 | Qinmai 8           | <i>Hap1</i> | II  |
| 150 | Liken 2            | <i>Hap2</i> | II  |
| 151 | Shan 8786-0-3      | <i>Hap3</i> | II  |
| 152 | Shan 70-1          | <i>Hap2</i> | II  |
| 153 | Shannong 7859      | <i>Hap2</i> | II  |
| 154 | Shannong 229       | <i>Hap2</i> | II  |
| 155 | Fuzhuang 30        | <i>Hap3</i> | II  |
| 156 | Qinmai 3           | <i>Hap2</i> | II  |
| 157 | Fen 22             | <i>Hap2</i> | II  |
| 158 | Xiannong 39        | <i>Hap2</i> | II  |
| 159 | Xiannong 151       | <i>Hap2</i> | II  |
| 160 | Shan 7219-8-11-2-1 | <i>Hap1</i> | II  |
| 161 | Xiaoyan 6          | <i>Hap2</i> | II  |
| 162 | Gaoyou 503         | <i>Hap2</i> | II  |
| 163 | Ningfengmai        | <i>Hap2</i> | II  |
| 164 | Huaimai 11         | <i>Hap1</i> | II  |
| 165 | Huaimai 12         | <i>Hap2</i> | II  |
| 166 | Xuzhou 19          | <i>Hap2</i> | II  |
| 167 | Xuzhou 21          | <i>Hap2</i> | II  |
| 168 | Xuzhou 22          | <i>Hap1</i> | II  |
| 169 | Bu 84111           | <i>Hap2</i> | II  |
| 170 | Wo 80              | <i>Hap2</i> | II  |
| 171 | Xiaonong 76189     | <i>Hap2</i> | II  |
| 172 | Zhangdong 29       | <i>Hap2</i> | II  |
| 173 | Pingliang 35       | <i>Hap1</i> | II  |
| 174 | Wanyuan 28 Dali    | <i>Hap2</i> | III |
| 175 | Anhui 11           | <i>Hap2</i> | III |
| 176 | Anhui 3            | <i>Hap1</i> | III |
| 177 | Mengfeng 8         | <i>Hap2</i> | III |
| 178 | Anhui 9            | <i>Hap2</i> | III |
| 179 | Wanpin 8203        | <i>Hap2</i> | III |
| 180 | Wan 85-50-Fan3     | <i>Hap3</i> | III |
| 181 | Wan 89193          | <i>Hap3</i> | III |
| 182 | Wanpin 8337        | <i>Hap1</i> | III |
| 183 | Wanpin 8410        | <i>Hap1</i> | III |
| 184 | Huadong 6          | <i>Hap2</i> | III |
| 185 | Siyang 117         | <i>Hap2</i> | III |
| 186 | Sumai 3            | <i>Hap2</i> | III |
| 187 | Wangmai 17         | <i>Hap2</i> | III |
| 188 | Kang R16           | <i>Hap2</i> | III |
| 189 | Ningmaizi 44       | <i>Hap3</i> | III |

|     |                  |             |     |
|-----|------------------|-------------|-----|
| 190 | Yangmai 158      | <i>Hap1</i> | III |
| 191 | Huadong 10       | <i>Hap1</i> | III |
| 192 | Ning 8343        | <i>Hap1</i> | III |
| 193 | Ning 8537        | <i>Hap3</i> | III |
| 194 | Ningmaizi 3      | <i>Hap1</i> | III |
| 195 | Ningmaizi 13     | <i>Hap1</i> | III |
| 196 | Ning 8924        | <i>Hap2</i> | III |
| 197 | Ningmaizi 19     | <i>Hap2</i> | III |
| 198 | Sujian 14        | <i>Hap2</i> | III |
| 199 | Nanda 8910       | <i>Hap3</i> | III |
| 200 | Nannong 2293xuan | <i>Hap1</i> | III |
| 201 | Liyang 1         | <i>Hap1</i> | III |
| 202 | Liyang 5         | <i>Hap3</i> | III |
| 203 | Zhongshan 9      | <i>Hap2</i> | III |
| 204 | Jiulan           | <i>Hap3</i> | III |
| 205 | Zhemai 1         | <i>Hap3</i> | III |
| 206 | Limai 16         | <i>Hap2</i> | III |
| 207 | Jiamai 25        | <i>Hap2</i> | III |
| 208 | Nanzhongzao      | <i>Hap2</i> | III |
| 209 | Zhemai 4         | <i>Hap2</i> | III |
| 210 | Zhexuan 78-23    | <i>Hap3</i> | III |
| 211 | Emai 6           | <i>Hap2</i> | III |
| 212 | Jingzhou 2       | <i>Hap2</i> | III |
| 213 | Exi 84-1031      | <i>Hap2</i> | III |
| 214 | Exi 652          | <i>Hap2</i> | III |
| 215 | Enmai 4          | <i>Hap1</i> | III |
| 216 | E 811            | <i>Hap2</i> | III |
| 217 | Yimai 1          | <i>Hap2</i> | III |
| 218 | Yixi 102         | <i>Hap2</i> | III |
| 219 | Xiangmai 8       | <i>Hap2</i> | III |
| 220 | Xiangmai 12      | <i>Hap2</i> | III |
| 221 | Zhongjiwan       | <i>Hap2</i> | III |
| 222 | Xiang 791-2      | <i>Hap2</i> | III |
| 223 | Zhongana 875     | <i>Hap2</i> | III |
| 224 | Gan 162          | <i>Hap2</i> | III |
| 225 | Hechang 45       | <i>Hap2</i> | IV  |
| 226 | Shuwan 8         | <i>Hap1</i> | IV  |
| 227 | Sichuan 51       | <i>Hap1</i> | IV  |
| 228 | Chuanmai 10      | <i>Hap2</i> | IV  |
| 229 | Chuanmai 19      | <i>Hap2</i> | IV  |
| 230 | Chuanmai 22      | <i>Hap3</i> | IV  |
| 231 | Yaanzao          | <i>Hap3</i> | IV  |
| 232 | Fan 6            | <i>Hap3</i> | IV  |
| 233 | Hongai 1         | <i>Hap3</i> | IV  |



|     |                  |             |    |
|-----|------------------|-------------|----|
| 234 | XichangfanxiuMai | <i>Hap1</i> | IV |
| 235 | Chuanyu 12       | <i>Hap2</i> | IV |
| 236 | Mianyang 11      | <i>Hap3</i> | IV |
| 237 | Mianyang 26      | <i>Hap1</i> | IV |
| 238 | Chuan 83C-1001   | <i>Hap2</i> | IV |
| 239 | Chuan 7911       | <i>Hap2</i> | IV |
| 240 | Xichang 5548-9   | <i>Hap2</i> | IV |
| 241 | Pan 86001-3      | <i>Hap2</i> | IV |
| 242 | Pan 88080-3-1-1  | <i>Hap2</i> | IV |
| 243 | Bimai 10         | <i>Hap2</i> | IV |
| 244 | Bimai 13         | <i>Hap2</i> | IV |
| 245 | Bimai 26         | <i>Hap2</i> | IV |
| 246 | Xingzhuai 3      | <i>Hap2</i> | IV |
| 247 | Qianjian 28      | <i>Hap2</i> | IV |
| 248 | Guinong 10       | <i>Hap2</i> | IV |
| 249 | Guinong Y13      | <i>Hap2</i> | IV |
| 250 | Gui 775          | <i>Hap2</i> | IV |
| 251 | Xingyingwu 3     | <i>Hap2</i> | IV |
| 252 | Kengua 1         | <i>Hap2</i> | IV |
| 253 | Xingyi 4         | <i>Hap2</i> | IV |
| 254 | Hemai 8052       | <i>Hap2</i> | IV |
| 255 | Yunmai 28        | <i>Hap2</i> | IV |
| 256 | Yunmai 29        | <i>Hap3</i> | IV |
| 257 | Yunmai 33        | <i>Hap2</i> | IV |
| 258 | Yunmai 34        | <i>Hap2</i> | IV |
| 259 | Fengmai 11       | <i>Hap2</i> | IV |
| 260 | Nanyuan 1        | <i>Hap2</i> | IV |
| 261 | Jingmai 2        | <i>Hap1</i> | IV |
| 262 | Pu 170           | <i>Hap2</i> | IV |
| 263 | Dian 622-525-2   | <i>Hap1</i> | IV |
| 264 | Dian 8613        | <i>Hap1</i> | IV |
| 265 | Kangxiu 10       | <i>Hap3</i> | V  |
| 266 | Dixiuzao         | <i>Hap2</i> | V  |
| 267 | Jinmai 2148      | <i>Hap2</i> | V  |
| 268 | Longxi 35        | <i>Hap2</i> | V  |
| 269 | Fufan 904        | <i>Hap3</i> | V  |
| 270 | Yuanshan         | <i>Hap3</i> | V  |
| 271 | Taizhongxuan 2   | <i>Hap2</i> | V  |
| 272 | Taizhong 23      | <i>Hap1</i> | V  |
| 273 | Dongnong 101     | <i>Hap1</i> | VI |
| 274 | Hezuo 3          | <i>Hap2</i> | VI |
| 275 | Hei 78-1259      | <i>Hap2</i> | VI |
| 276 | Heifu 84S1378    | <i>Hap3</i> | VI |
| 277 | Jia 6268A-549    | <i>Hap1</i> | VI |

|     |                         |             |      |
|-----|-------------------------|-------------|------|
| 278 | Jia 84-S437             | <i>Hap2</i> | VI   |
| 279 | Kefeng 3                | <i>Hap2</i> | VI   |
| 280 | Kelao 4                 | <i>Hap2</i> | VI   |
| 281 | Kequn                   | <i>Hap2</i> | VI   |
| 282 | Kenbei 1                | <i>Hap1</i> | VI   |
| 283 | Kenda 1                 | <i>Hap1</i> | VI   |
| 284 | Kenhong 15              | <i>Hap2</i> | VI   |
| 285 | Long 79-9468            | <i>Hap2</i> | VI   |
| 286 | Longfumai 2             | <i>Hap2</i> | VI   |
| 287 | Longmai 18              | <i>Hap2</i> | VI   |
| 288 | Longmai 19              | <i>Hap2</i> | VI   |
| 289 | Xinkehan 9              | <i>Hap2</i> | VI   |
| 290 | Xinshuguang 1           | <i>Hap2</i> | VI   |
| 291 | Xinshuguang 6           | <i>Hap1</i> | VI   |
| 292 | Fengqiang 3             | <i>Hap1</i> | VI   |
| 293 | Jichun 1016             | <i>Hap1</i> | VI   |
| 294 | Xiaobingmai 33          | <i>Hap2</i> | VI   |
| 295 | Jinghong 5              | <i>Hap1</i> | VII  |
| 296 | Pinchun 14              | <i>Hap1</i> | VII  |
| 297 | Jiba 7529               | <i>Hap2</i> | VII  |
| 298 | Jichun 8055-1           | <i>Hap3</i> | VII  |
| 299 | Yanbei 8                | <i>Hap2</i> | VII  |
| 300 | Jinchun 3               | <i>Hap3</i> | VII  |
| 301 | Lianglaiyoubaipixiaomai | <i>Hap3</i> | VII  |
| 302 | Bihongsui               | <i>Hap2</i> | VII  |
| 303 | Neimai 11               | <i>Hap2</i> | VII  |
| 304 | Ganmai 6                | <i>Hap3</i> | VIII |
| 305 | Ganmai 8                | <i>Hap1</i> | VIII |
| 306 | Longchun 7              | <i>Hap1</i> | VIII |
| 307 | Dingxi 24               | <i>Hap1</i> | VIII |
| 308 | Linnong 12              | <i>Hap2</i> | VIII |
| 309 | Jinmai 4                | <i>Hap2</i> | VIII |
| 310 | Wudu 5                  | <i>Hap1</i> | VIII |
| 311 | Longdong 1              | <i>Hap2</i> | VIII |
| 312 | Xifeng 9                | <i>Hap2</i> | VIII |
| 313 | Xifeng 10               | <i>Hap2</i> | VIII |
| 314 | Qingfeng 1              | <i>Hap2</i> | VIII |
| 315 | Zhangchun 9             | <i>Hap1</i> | VIII |
| 316 | Ganmai 46               | <i>Hap3</i> | VIII |
| 317 | Huining 5               | <i>Hap2</i> | VIII |
| 318 | Huining 10              | <i>Hap2</i> | VIII |
| 319 | Wuchun 1                | <i>Hap2</i> | VIII |
| 320 | Jinmai 303              | <i>Hap2</i> | VIII |
| 321 | Gan Tal21-10-2          | <i>Hap2</i> | VIII |

|     |              |             |      |
|-----|--------------|-------------|------|
| 322 | Gan 8221-1-1 | <i>Hap2</i> | VIII |
| 323 | Gan 8358-2   | <i>Hap1</i> | VIII |
| 324 | Hongtu       | <i>Hap1</i> | VIII |
| 325 | Ningchun 4   | <i>Hap2</i> | VIII |
| 326 | Shi 886      | <i>Hap2</i> | VIII |
| 327 | Ning 87N2801 | <i>Hap2</i> | VIII |
| 328 | Jian 72      | <i>Hap2</i> | VIII |
| 329 | Xiangnong 3  | <i>Hap3</i> | VIII |
| 330 | Gaoyuan 506  | <i>Hap1</i> | VIII |
| 331 | Huzhuhong    | <i>Hap2</i> | VIII |
| 332 | Qingchun 25  | <i>Hap2</i> | VIII |
| 333 | Qingchun 28  | <i>Hap2</i> | VIII |
| 334 | Gaoyuan 338  | <i>Hap1</i> | VIII |
| 335 | Gaoyuan 602  | <i>Hap2</i> | VIII |
| 336 | Zangdong 4   | <i>Hap2</i> | IX   |
| 337 | Rikaze 7     | <i>Hap2</i> | IX   |
| 338 | Rikaze 8     | <i>Hap2</i> | IX   |
| 339 | Rikaze 54    | <i>Hap2</i> | IX   |
| 340 | Xindong 2    | <i>Hap2</i> | X    |
| 341 | Changdong 5  | <i>Hap1</i> | X    |
| 342 | Kashi 1      | <i>Hap2</i> | X    |
| 343 | Kashibaipi   | <i>Hap2</i> | X    |
| 344 | Tuokexun 1   | <i>Hap2</i> | X    |
| 345 | Tuchun 6     | <i>Hap2</i> | X    |
| 346 | Xinchun 2    | <i>Hap2</i> | X    |
| 347 | Jiudong 2    | <i>Hap2</i> | X    |
| 348 | Yinong 8     | <i>Hap1</i> | X    |

**Supplementary Table 5.** Marker/trait association analysis of *TaSPL14-7A* haplotypes in 348 modern cultivars (MC) grown in three environments.

| Traits  | 2002LY         |                |                |
|---------|----------------|----------------|----------------|
|         | <i>7A-Hap1</i> | <i>7A-Hap2</i> | <i>7A-Hap3</i> |
| HD (d)  | 175.42±0.52a   | 177.16±0.39b   | 176.77±0.74ab  |
| MD (d)  | 226.55±0.85a   | 226.15±0.52a   | 227.02±1.04a   |
| SL (cm) | 10.5±0.21a     | 10.67±0.15a    | 10.13±0.29a    |
| SN      | 21.23±0.28a    | 21.14±0.18a    | 21.52±0.34a    |
| PH (cm) | 91.16±8.54ab   | 91.42±1.25a    | 98.12±3.11b    |
| GN      | 52.41±1.13a    | 52.07±0.77a    | 54.28±1.39a    |
| ETN     | 6.96±0.26a     | 7.08±0.18a     | 7.95±0.37b     |
| TKW (g) | 43.77±0.65A    | 43.27±0.45A    | 38.28±0.89B    |
| KL (cm) | 0.67±0.01A     | 0.68±0.00A     | 0.64±0.01B     |
| KW (cm) | 0.34±0.00a     | 0.34±0.00a     | 0.33±0.00a     |
| KT (cm) | 0.29±0.00a     | 0.29±0.00a     | 0.28±0.00a     |

| Traits  | 2005LY          |                  |                 |
|---------|-----------------|------------------|-----------------|
|         | 7A-Hap1         | 7A-Hap2          | 7A-Hap3         |
| HD (d)  | 198.95 ±0.43a   | 199.47 ±0.28a    | 199.71 ±0.50a   |
| MD (d)  | 237.07 ±0.44a   | 237.16 ±0.25a    | 237.4 ±0.50a    |
| SL (cm) | 9.16 ±0.21ab    | 9.34 ±0.11a      | 8.75 ±0.22b     |
| SN      | 21.37 ±0.23a    | 21.28 ±0.14a     | 21.21 ±0.29a    |
| PH (cm) | 88.67 ±2.07a(A) | 93.04 ±1.23a(AB) | 99.12 ±2.75b(B) |
| GN      | 46.37 ±0.83a    | 47.54 ±0.61a     | 46.86 ±1.25a    |
| ETN     | 8.57 ±0.34a     | 9.11 ±0.25a      | 9.34 ±0.47a     |
| TKW (g) | 40.7 ±0.78A     | 40.04 ±0.42A     | 35.84 ±0.95B    |
| KL (cm) | 0.69 ±0.01A     | 0.69 ±0.00A      | 0.66 ±0.01B     |
| KW (cm) | 0.33 ±0.00A     | 0.33 ±0.00A      | 0.32 ±0.00B     |
| KT (cm) | 0.30 ±0.00A     | 0.29 ±0.00B      | 0.29 ±0.00B     |
| Traits  | 2010SY          |                  |                 |
|         | 7A-Hap1         | 7A-Hap2          | 7A-Hap3         |
| HD (d)  | 217.45 ±0.38a   | 217.46 ±0.24a    | 218.27 ±0.47a   |
| MD (d)  | 253.09 ±0.35a   | 253.16 ±0.22a    | 254.02 ±0.45a   |
| SL (cm) | 9.76 ±0.17a     | 10.08 ±0.11a     | 9.74 ±0.23a     |
| SN      | 20.53 ±0.21a    | 20.75 ±0.14a     | 20.70 ±0.30a    |
| PH (cm) | 87.58 ±1.91a(A) | 90.16 ±1.15a(AB) | 95.57 ±2.32b(B) |
| GN      | 54.61 ±0.93a    | 53.42 ±0.65a     | 53.82 ±1.40a    |
| ETN     | 11.70 ±0.52AB   | 11.34 ±0.22A     | 13.11 ±0.61B    |
| TKW (g) | 40.95 ±0.81A    | 40.7 ±0.39A      | 35.37 ±0.86B    |
| KL (cm) | 0.69 ±0.01A     | 0.69 ±0.00A      | 0.66 ±0.01B     |
| KW (cm) | 0.33 ±0.00A     | 0.32 ±0.00A      | 0.31 ±0.00B     |
| KT (cm) | 0.30 ±0.00a     | 0.30 ±0.00a      | 0.31 ±0.02a     |

HD, heading date; MD, maturity date; SL, spike length; SN, spikelet number per spike; PH, plant height; GN, grain number per spike; ETN, effective tiller number; TKW, thousand kernel weight; KL, kernel length; KW, kernel width; KT, kernel thickness. Data are means ± SE. Uppercase letters and lowercase letters indicate extremely significant ( $P < 0.01$ ) and significant differences ( $P < 0.05$ ) between haplotypes respectively.

**Supplementary Table 6.** Genotypes of 1,051 global accessions.

| Number                    | Accession               | <i>TaSPL14-7A</i> haplotype |
|---------------------------|-------------------------|-----------------------------|
| <b>European varieties</b> |                         |                             |
| 1                         | AMADEUS                 | <i>Hap1</i>                 |
| 2                         | BRILLANT                | <i>Hap2</i>                 |
| 3                         | CHRISTIAN               | <i>Hap2</i>                 |
| 4                         | DUCK                    | <i>Hap2</i>                 |
| 5                         | ERLA KOLBEN             | <i>Hap2</i>                 |
| 6                         | FERDINAND               | <i>Hap1</i>                 |
| 7                         | HARRACH-6111            | <i>Hap2</i>                 |
| 8                         | HARRACH-6112            | <i>Hap2</i>                 |
| 9                         | LENTIA                  | <i>Hap2</i>                 |
| 10                        | MULTIBRAUN              | <i>Hap2</i>                 |
| 11                        | NEUHOF 1                | <i>Hap1</i>                 |
| 12                        | OENUS                   | <i>Hap2</i>                 |
| 13                        | PRIMUS                  | <i>Hap1</i>                 |
| 14                        | PROBSTDORFER ACCORD     | <i>Hap1</i>                 |
| 15                        | PROBSTDORFER MARTIN     | <i>Hap1</i>                 |
| 16                        | PROBSTDORFER PERLO      | <i>Hap2</i>                 |
| 17                        | PROBSTDORFER POKAL      | <i>Hap1</i>                 |
| 18                        | PROTECTOR               |                             |
| 19                        | RINNER WINTERWEISEN     | <i>Hap2</i>                 |
| 20                        | STABIL                  | <i>Hap2</i>                 |
| 21                        | SVENNO GRANNEN          | <i>Hap2</i>                 |
| 22                        | VERBESSERTER-STJOHANNER | <i>Hap1</i>                 |
| 23                        | AROSO                   | <i>Hap1</i>                 |
| 24                        | CAMA                    | <i>Hap2</i>                 |
| 25                        | CELESTA                 | <i>Hap2</i>                 |
| 26                        | CORA                    | <i>Hap2</i>                 |
| 27                        | GABY                    | <i>Hap1</i>                 |
| 28                        | HYBRIDE DU CENTENAIRE   | <i>Hap2</i>                 |
| 29                        | JASON                   | <i>Hap2</i>                 |
| 30                        | JUFY I                  | <i>Hap2</i>                 |
| 31                        | LEDA                    | <i>Hap2</i>                 |
| 32                        | MARCO                   | <i>Hap2</i>                 |
| 33                        | MARYSA                  | <i>Hap2</i>                 |
| 34                        | MINA                    | <i>Hap2</i>                 |
| 35                        | Odeon                   | <i>Hap2</i>                 |
| 36                        | PANTER                  | <i>Hap2</i>                 |
| 37                        | PHOEBUS                 | <i>Hap1</i>                 |
| 38                        | PONY                    | <i>Hap2</i>                 |
| 39                        | PRIMA                   | <i>Hap2</i>                 |

|    |                    |             |
|----|--------------------|-------------|
| 40 | PROFESSEUR DELOS   | <i>Hap2</i> |
| 41 | RENVAL             | <i>Hap2</i> |
| 42 | RUSTIQUE           | <i>Hap2</i> |
| 43 | STELLA             | <i>Hap2</i> |
| 44 | TRESOR_DE_GEMBLoux | <i>Hap1</i> |
| 45 | BULGARIA301        | <i>Hap1</i> |
| 46 | CARODEJKA'S'-      | <i>Hap2</i> |
| 47 | COLOMBO            | <i>Hap2</i> |
| 48 | GUSSENKA           | <i>Hap1</i> |
| 49 | HEBROS             | <i>Hap2</i> |
| 50 | IANTER             |             |
| 51 | IASEN              | <i>Hap2</i> |
| 52 | KS414              | <i>Hap2</i> |
| 53 | OAZIS              | <i>Hap1</i> |
| 54 | PERLA 1            | <i>Hap3</i> |
| 55 | PLISKA             | <i>Hap2</i> |
| 56 | PLISKA             | <i>Hap1</i> |
| 57 | PLOUDIN 1015       |             |
| 58 | PRIASPA            | <i>Hap2</i> |
| 59 | RUSALKA            | <i>Hap2</i> |
| 60 | SADOVO8            | <i>Hap2</i> |
| 61 | SKITIA             | <i>Hap1</i> |
| 62 | SLAVYANKA          |             |
| 63 | STEPNO             | <i>Hap2</i> |
| 64 | TRAJANA            | <i>Hap2</i> |
| 65 | UBILEI             | <i>Hap2</i> |
| 66 | YANA               | <i>Hap2</i> |
| 67 | ARDUS              | <i>Hap2</i> |
| 68 | ARINA              | <i>Hap2</i> |
| 69 | BERNINA            | <i>Hap2</i> |
| 70 | BESSO              | <i>Hap1</i> |
| 71 | Bretonnieres       | <i>Hap1</i> |
| 72 | DADORA             | <i>Hap2</i> |
| 73 | EIGER              | <i>Hap2</i> |
| 74 | FERMO              | <i>Hap2</i> |
| 75 | GRANAT             | <i>Hap2</i> |
| 76 | JUNZI              | <i>Hap1</i> |
| 77 | LITA               | <i>Hap1</i> |
| 78 | Lona               | <i>Hap1</i> |
| 79 | MONT-CALME         | <i>Hap2</i> |
| 80 | PAILLY             | <i>Hap2</i> |
| 81 | PROBELLE           | <i>Hap1</i> |
| 82 | Rouge de la Venoge | <i>Hap1</i> |
| 83 | ROUGE DE SORAT     | <i>Hap1</i> |

|     |                        |             |
|-----|------------------------|-------------|
| 84  | ROUGE DE VAUMARCUS     | <i>Hap2</i> |
| 85  | VUITEBOEUF             | <i>Hap1</i> |
| 86  | Wagenburger            | <i>Hap2</i> |
| 87  | ZENTA                  | <i>Hap1</i> |
| 88  | ASTA                   | <i>Hap1</i> |
| 89  | Blava                  | <i>Hap2</i> |
| 90  | BREA                   | <i>Hap2</i> |
| 91  | BRUTA                  | <i>Hap2</i> |
| 92  | DOBROVICKA             | <i>Hap2</i> |
| 93  | HODONINSKA_OSINATKA    | <i>Hap2</i> |
| 94  | KASTICKA OSINATKA      | <i>Hap1</i> |
| 95  | Lada                   | <i>Hap2</i> |
| 96  | Linda                  | <i>Hap2</i> |
| 97  | Livia                  | <i>Hap1</i> |
| 98  | Maja                   | <i>Hap2</i> |
| 99  | Oska                   | <i>Hap1</i> |
| 100 | Pavlina                | <i>Hap2</i> |
| 101 | Regina                 | <i>Hap2</i> |
| 102 | Saxana                 | <i>Hap1</i> |
| 103 | Senta                  | <i>Hap1</i> |
| 104 | SLOVENSKA INTENSIVNA   | <i>Hap2</i> |
| 105 | Viginta                | <i>Hap1</i> |
| 106 | Vlasta                 | <i>Hap2</i> |
| 107 | ZDAR                   | <i>Hap2</i> |
| 108 | ZIDLOCHOVICKA OSINATKA | <i>Hap1</i> |
| 109 | Zora                   | <i>Hap1</i> |
| 110 | Almus                  | <i>Hap1</i> |
| 111 | CARDOS                 | <i>Hap2</i> |
| 112 | CARIMULTI              | <i>Hap1</i> |
| 113 | CARPO                  | <i>Hap2</i> |
| 114 | Combi                  | <i>Hap2</i> |
| 115 | CRiEWENER              | <i>Hap2</i> |
| 116 | Fortschritt            | <i>Hap2</i> |
| 117 | GARANT                 | <i>Hap1</i> |
| 118 | Heines Kolben          | <i>Hap2</i> |
| 119 | Ibis                   | <i>Hap2</i> |
| 120 | KOLIBRI                | <i>Hap1</i> |
| 121 | Mikon                  | <i>Hap2</i> |
| 122 | MIRAS                  | <i>Hap2</i> |
| 123 | Ordeal                 | <i>Hap2</i> |
| 124 | PROBAT                 | <i>Hap2</i> |
| 125 | RECORD                 | <i>Hap2</i> |
| 126 | Riebesel 47-51         | <i>Hap2</i> |
| 127 | SIEGERLANDER           | <i>Hap2</i> |

|     |                          |             |
|-----|--------------------------|-------------|
| 128 | Taras                    | <i>Hap2</i> |
| 129 | Trane                    | <i>Hap1</i> |
| 130 | TREND                    | <i>Hap2</i> |
| 131 | ARAGON 03                | <i>Hap2</i> |
| 132 | ARGANDA                  | <i>Hap2</i> |
| 133 | AZULON                   | <i>Hap1</i> |
| 134 | BIVONA                   | <i>Hap2</i> |
| 135 | CABEZON DE GONI          | <i>Hap2</i> |
| 136 | CABEZON_DE_VALDEGONI     | <i>Hap2</i> |
| 137 | CAMPEADOR                | <i>Hap2</i> |
| 138 | CANALEJA 46              | <i>Hap2</i> |
| 139 | Candeal                  | <i>Hap1</i> |
| 140 | CARRION-PIRON            | <i>Hap1</i> |
| 141 | CATALAN-COMPACTO         | <i>Hap1</i> |
| 142 | COMPADRE                 | <i>Hap2</i> |
| 143 | JEJA DE VALENCIA         | <i>Hap2</i> |
| 144 | MAIORCA                  | <i>Hap1</i> |
| 145 | MONTEJUICK               | <i>Hap1</i> |
| 146 | PANE 14                  | <i>Hap1</i> |
| 147 | PANE10                   | <i>Hap1</i> |
| 148 | PANE-247                 | <i>Hap2</i> |
| 149 | TREMESINO MONTEROSA      | <i>Hap2</i> |
| 150 | TREMESINO XINZO DE LIMIA | <i>Hap2</i> |
| 151 | VILLAVERDE DE TRUCIOS    | <i>Hap1</i> |
| 152 | XEXA DEL VALL            | <i>Hap1</i> |
| 153 | AN048-19                 | <i>Hap2</i> |
| 154 | ANTTI                    | <i>Hap2</i> |
| 155 | APU                      | <i>Hap1</i> |
| 156 | JO3021                   | <i>Hap1</i> |
| 157 | JOUKO                    | <i>Hap1</i> |
| 158 | JUVA                     | <i>Hap1</i> |
| 159 | KIMMO                    | <i>Hap1</i> |
| 160 | NISU                     | <i>Hap2</i> |
| 161 | Olympia                  | <i>Hap1</i> |
| 162 | SOPU 7                   | <i>Hap2</i> |
| 163 | Tammi                    | <i>Hap1</i> |
| 164 | ALIGRE                   | <i>Hap1</i> |
| 165 | ALLIES                   | <i>Hap1</i> |
| 166 | ARPEGE                   | <i>Hap1</i> |
| 167 | AZTEC                    | <i>Hap2</i> |
| 168 | BLE DES DOMES            | <i>Hap2</i> |
| 169 | CAPITOLE                 | <i>Hap2</i> |
| 170 | CHAMPLEIN                | <i>Hap1</i> |
| 171 | ELITE LEPEUPLE           | <i>Hap1</i> |



|     |                        |             |
|-----|------------------------|-------------|
| 172 | ETOILE DE_CHOISY       | <i>Hap1</i> |
| 173 | EUREKA                 | <i>Hap2</i> |
| 174 | FLORENCE_AURORE        | <i>Hap2</i> |
| 175 | GOYA                   | <i>Hap2</i> |
| 176 | HYBRIDE_DE_BERSEE      | <i>Hap2</i> |
| 177 | HYBRIDE_DE_LA_PAIX     | <i>Hap1</i> |
| 178 | HYBRIDE_DU_TRESOR      | <i>Hap2</i> |
| 179 | ISENGRAIN              | <i>Hap1</i> |
| 180 | JAPHET                 | <i>Hap1</i> |
| 181 | MAGALI BLONDEAU        | <i>Hap1</i> |
| 182 | MARNE DESPREZ          | <i>Hap2</i> |
| 183 | MELBOR                 | <i>Hap2</i> |
| 184 | NORD-DESPREZ           | <i>Hap2</i> |
| 185 | PANIFOR                | <i>Hap2</i> |
| 186 | SOISSONS               | <i>Hap2</i> |
| 187 | TADEPI                 | <i>Hap2</i> |
| 188 | VILMORIN 53            | <i>Hap1</i> |
| 189 | VILMORIN23             | <i>Hap2</i> |
| 190 | VIRTUOSE               | <i>Hap2</i> |
| 191 | YGA_BLONDEAU           | <i>Hap2</i> |
| 192 | Banner                 | <i>Hap1</i> |
| 193 | BARON                  | <i>Hap1</i> |
| 194 | BENEFACTOR             | <i>Hap2</i> |
| 195 | BRANDO                 | <i>Hap2</i> |
| 196 | BRIGADIER              | <i>Hap2</i> |
| 197 | Brock                  | <i>Hap2</i> |
| 198 | GOLDENTROP             | <i>Hap1</i> |
| 199 | HICKLING               | <i>Hap1</i> |
| 200 | HICKLING BLANC DE MARS | <i>Hap2</i> |
| 201 | MALACCA                | <i>Hap1</i> |
| 202 | Maris Beacon           | <i>Hap2</i> |
| 203 | Maris Bilbo            | <i>Hap2</i> |
| 204 | Maris Nimrod           | <i>Hap1</i> |
| 205 | MARKET                 | <i>Hap1</i> |
| 206 | Norman                 | <i>Hap1</i> |
| 207 | SCHIREFF_SQUAREHEAD    | <i>Hap2</i> |
| 208 | SHAMROCK               | <i>Hap1</i> |
| 209 | SHANGO                 | <i>Hap2</i> |
| 210 | SHIREFF-BLANC-BARBU    | <i>Hap2</i> |
| 211 | TORFIDA                | <i>Hap2</i> |
| 212 | VICTOR                 | <i>Hap2</i> |
| 213 | Virtue                 | <i>Hap1</i> |
| 214 | ALFOLD                 | <i>Hap2</i> |
| 215 | Banatka                | <i>Hap2</i> |

|     |                     |             |
|-----|---------------------|-------------|
| 216 | BANATKA             | <i>Hap1</i> |
| 217 | BETA BANKUTI        | <i>Hap2</i> |
| 218 | ESTERHAZY           | <i>Hap2</i> |
| 219 | FERTODI293          | <i>Hap2</i> |
| 220 | GK Bank             | <i>Hap2</i> |
| 221 | GK BENCE            | <i>Hap2</i> |
| 222 | GK CSUROS           | <i>Hap2</i> |
| 223 | GK Istvan           | <i>Hap2</i> |
| 224 | GK ORZSE            | <i>Hap2</i> |
| 225 | GK Szeged           | <i>Hap1</i> |
| 226 | GK_BARNA            | <i>Hap2</i> |
| 227 | GK_SAGVARI          | <i>Hap2</i> |
| 228 | GKF2                | <i>Hap2</i> |
| 229 | KARCAGI 522         | <i>Hap1</i> |
| 230 | KOMPOLTI 169        | <i>Hap2</i> |
| 231 | LOVASZPATONAI 407   | <i>Hap2</i> |
| 232 | MARTONVASARI 23     | <i>Hap2</i> |
| 233 | Mv Magvas           | <i>Hap2</i> |
| 234 | MV SUMMA            | <i>Hap2</i> |
| 235 | Mv Tamara           | <i>Hap1</i> |
| 236 | Adria               | <i>Hap1</i> |
| 237 | Aquila              | <i>Hap1</i> |
| 238 | ARGELATO            | <i>Hap2</i> |
| 239 | AUTONOMIA           | <i>Hap2</i> |
| 240 | CAMPODORO           | <i>Hap3</i> |
| 241 | CARLOTTA STRAMPELLI | <i>Hap1</i> |
| 242 | CERVARO             | <i>Hap1</i> |
| 243 | ELIA                | <i>Hap1</i> |
| 244 | Falchetto           | <i>Hap2</i> |
| 245 | FLAMINIO            | <i>Hap2</i> |
| 246 | Fortunato           | <i>Hap2</i> |
| 247 | FRASSINETTO 405     | <i>Hap1</i> |
| 248 | FUNO                | <i>Hap1</i> |
| 249 | Funone              | <i>Hap2</i> |
| 250 | GENTILE ROSSO       | <i>Hap2</i> |
| 251 | Lario               | <i>Hap1</i> |
| 252 | LEONE               | <i>Hap1</i> |
| 253 | LONTRA              | <i>Hap1</i> |
| 254 | Loreto              | <i>Hap1</i> |
| 255 | Maestra             | <i>Hap2</i> |
| 256 | MARA                | <i>Hap1</i> |
| 257 | Pegaso              | <i>Hap2</i> |
| 258 | BALDUS              | <i>Hap1</i> |
| 259 | BERCY               | <i>Hap1</i> |

|     |                            |             |
|-----|----------------------------|-------------|
| 260 | Cleo                       | <i>Hap1</i> |
| 261 | Donata                     | <i>Hap1</i> |
| 262 | DONG                       | <i>Hap2</i> |
| 263 | EMMA                       | <i>Hap2</i> |
| 264 | Flevina                    | <i>Hap2</i> |
| 265 | KNAL                       | <i>Hap1</i> |
| 266 | LOUVRE                     | <i>Hap1</i> |
| 267 | MAGNUS                     | <i>Hap1</i> |
| 268 | MANSHOLTS-WITTE            | <i>Hap2</i> |
| 269 | MILDRESS                   |             |
| 270 | ORCA                       | <i>Hap2</i> |
| 271 | PANG                       | <i>Hap2</i> |
| 272 | PLOF                       | <i>Hap2</i> |
| 273 | ROTONDE                    | <i>Hap2</i> |
| 274 | SAMBO                      | <i>Hap1</i> |
| 275 | Sarno                      | <i>Hap2</i> |
| 276 | STARING                    | <i>Hap2</i> |
| 277 | VADA                       | <i>Hap1</i> |
| 278 | VASCO                      | <i>Hap2</i> |
| 279 | VERSAILLES                 |             |
| 280 | Banatka                    | <i>Hap2</i> |
| 281 | DANKOWSKA IDEALNA          | <i>Hap2</i> |
| 282 | EKA NOWA                   | <i>Hap2</i> |
| 283 | GRANIATKA ZACHODNIA        | <i>Hap2</i> |
| 284 | JANA                       | <i>Hap1</i> |
| 285 | KOMOROWSKA-POL             | <i>Hap2</i> |
| 286 | KUTNOWIANKA                | <i>Hap2</i> |
| 287 | LUNA                       | <i>Hap2</i> |
| 288 | MODRA                      | <i>Hap1</i> |
| 289 | OLZA                       | <i>Hap2</i> |
| 290 | OSTKA POPULARNA            | <i>Hap2</i> |
| 291 | PANDA                      | <i>Hap2</i> |
| 292 | PODKOWIANKA                | <i>Hap2</i> |
| 293 | POLANKA                    | <i>Hap1</i> |
| 294 | Przodownica                | <i>Hap2</i> |
| 295 | ROZTOCKA                   | <i>Hap2</i> |
| 296 | Slazaczka                  | <i>Hap1</i> |
| 297 | Szelejewska                | <i>Hap1</i> |
| 298 | WENEDA                     | <i>Hap1</i> |
| 299 | WYSOKOLITEWKA 218          | <i>Hap2</i> |
| 300 | Wysokolitewka Sztynnosloma | <i>Hap2</i> |
| 301 | ZELAZNA                    | <i>Hap2</i> |
| 302 | ALMONSOR                   | <i>Hap2</i> |
| 303 | Amarelo de Barba Branca    | <i>Hap2</i> |

|     |                  |             |
|-----|------------------|-------------|
| 304 | ELVAS 61P17      | <i>Hap2</i> |
| 305 | ELVAS 62H12      | <i>Hap2</i> |
| 306 | ELVAS 62H9       | <i>Hap2</i> |
| 307 | ELVAS 63P16      | <i>Hap1</i> |
| 308 | ELVAS 68H16      | <i>Hap2</i> |
| 309 | ELVAS-60P24      | <i>Hap2</i> |
| 310 | PADEIRA          | <i>Hap2</i> |
| 311 | RIBEIRO INERME   | <i>Hap2</i> |
| 312 | RIBEIRO~PI185706 | <i>Hap2</i> |
| 313 | RIBEIRO~PI192624 | <i>Hap1</i> |
| 314 | RIBEIRO~PI266901 | <i>Hap1</i> |
| 315 | RUIVO            | <i>Hap1</i> |
| 316 | TUA              | <i>Hap1</i> |
| 317 | ALBOTA           | <i>Hap2</i> |
| 318 | ARIESAN          | <i>Hap2</i> |
| 319 | BUCOVINA         | <i>Hap2</i> |
| 320 | CERES            | <i>Hap2</i> |
| 321 | DOINA            | <i>Hap2</i> |
| 322 | FAVORIT          | <i>Hap2</i> |
| 323 | FLAMURA 80       | <i>Hap1</i> |
| 324 | FUNDULEA 4       | <i>Hap2</i> |
| 325 | FUNDULEA 262     | <i>Hap2</i> |
| 326 | FUNDULEA133      | <i>Hap1</i> |
| 327 | IULIA-ROM        | <i>Hap1</i> |
| 328 | LOVRIN 10        | <i>Hap2</i> |
| 329 | LOVRIN 13        | <i>Hap1</i> |
| 330 | LOVRIN 29        | <i>Hap2</i> |
| 331 | LOVRIN 32        | <i>Hap2</i> |
| 332 | LOVRIN 34        | <i>Hap2</i> |
| 333 | MAGURELE 7       | <i>Hap2</i> |
| 334 | ODVOS 5          | <i>Hap2</i> |
| 335 | POTAISSA         | <i>Hap1</i> |
| 336 | SILVANA          | <i>Hap1</i> |
| 337 | TRANSILVANIA1    | <i>Hap2</i> |
| 338 | TURDA 195        | <i>Hap2</i> |
| 339 | ALGOT            | <i>Hap1</i> |
| 340 | AROS             | <i>Hap2</i> |
| 341 | ATLE             | <i>Hap2</i> |
| 342 | BANCO            | <i>Hap1</i> |
| 343 | CROUSTY          | <i>Hap1</i> |
| 344 | Diamant          | <i>Hap2</i> |
| 345 | ERGO II          | <i>Hap1</i> |
| 346 | FAGOTT           | <i>Hap1</i> |
| 347 | IDUNA            | <i>Hap2</i> |

|     |                     |             |
|-----|---------------------|-------------|
| 348 | KUBB                | <i>Hap1</i> |
| 349 | NORRE               | <i>Hap2</i> |
| 350 | ORCANO              | <i>Hap1</i> |
| 351 | Pansar II           | <i>Hap1</i> |
| 352 | POMPE               | <i>Hap2</i> |
| 353 | PONDUS              | <i>Hap2</i> |
| 354 | Saffran             | <i>Hap2</i> |
| 355 | SKANDIA             | <i>Hap1</i> |
| 356 | SOLEIL              | <i>Hap2</i> |
| 357 | Sunnan              | <i>Hap1</i> |
| 358 | THULLE II           | <i>Hap2</i> |
| 359 | TIMMO               | <i>Hap2</i> |
| 360 | VIRTUS              | <i>Hap1</i> |
| 361 | AGROUNIJA           | <i>Hap2</i> |
| 362 | Banacanka 1         | <i>Hap2</i> |
| 363 | Banatka             | <i>Hap2</i> |
| 364 | BARANJKA            | <i>Hap2</i> |
| 365 | BECEJKA             | <i>Hap1</i> |
| 366 | CERVENA VROUSKA     | <i>Hap2</i> |
| 367 | Dobro polje         | <i>Hap2</i> |
| 368 | DUGOKLASA           | <i>Hap1</i> |
| 369 | Dukat               | <i>Hap2</i> |
| 370 | JARKA               | <i>Hap1</i> |
| 371 | KRAJINKA            | <i>Hap2</i> |
| 372 | LEPENICA            | <i>Hap2</i> |
| 373 | NOVOSADSKA CRVENA   | <i>Hap2</i> |
| 374 | OROVCANKA           | <i>Hap2</i> |
| 375 | PANONIJA            | <i>Hap2</i> |
| 376 | POSAVKA             | <i>Hap3</i> |
| 377 | RADUSA              | <i>Hap2</i> |
| 378 | RAVNICA             | <i>Hap2</i> |
| 379 | Sava                | <i>Hap2</i> |
| 380 | STIZANKA            | <i>Hap2</i> |
| 381 | SUMADIJA            | <i>Hap1</i> |
| 382 | Sutjeska            | <i>Hap2</i> |
| 383 | Bourgeois           | <i>Hap2</i> |
| 384 | Blausamliger Kolben | <i>Hap1</i> |

---

**North American varieties**

|   |                  |             |
|---|------------------|-------------|
| 1 | ZIMMERMAN        | <i>Hap2</i> |
| 2 | Pride of Genesee | <i>Hap2</i> |
| 3 | Democrat         | <i>Hap1</i> |
| 4 | Red Chief        | <i>Hap3</i> |
| 5 | Gipsy            | <i>Hap1</i> |
| 6 | Red Wave         | <i>Hap1</i> |

|    |                          |             |
|----|--------------------------|-------------|
| 7  | Power                    | <i>Hap2</i> |
| 8  | Sherman                  | <i>Hap1</i> |
| 9  | White Odessa             | <i>Hap1</i> |
| 10 | Fulcaster                | <i>Hap1</i> |
| 11 | Kanred                   | <i>Hap1</i> |
| 12 | Nebraska No. 28          | <i>Hap1</i> |
| 13 | Minhardi                 | <i>Hap1</i> |
| 14 | Mediterranean            | <i>Hap2</i> |
| 15 | Red May                  | <i>Hap2</i> |
| 16 | Imperial Amber           | <i>Hap3</i> |
| 17 | Illini Chief             | <i>Hap1</i> |
| 18 | Red Rock                 | <i>Hap1</i> |
| 19 | Rice                     | <i>Hap2</i> |
| 20 | Penquite                 | <i>Hap2</i> |
| 21 | Minturki                 | <i>Hap2</i> |
| 22 | Nebraska No. 60          | <i>Hap2</i> |
| 23 | Blackhull                | <i>Hap1</i> |
| 24 | Wisconsin Pedigree No. 2 | <i>Hap2</i> |
| 25 | Forward                  | <i>Hap3</i> |
| 26 | Karmont                  | <i>Hap1</i> |
| 27 | Marquillo                | <i>Hap3</i> |
| 28 | Ceres                    | <i>Hap2</i> |
| 29 | Iobred                   |             |
| 30 | Newturk                  | <i>Hap1</i> |
| 31 | Tenmarq                  | <i>Hap1</i> |
| 32 | Yogo                     | <i>Hap2</i> |
| 33 | Kawvale                  | <i>Hap1</i> |
| 34 | Ilred                    | <i>Hap2</i> |
| 35 | Oro                      | <i>Hap1</i> |
| 36 | Purkof                   | <i>Hap1</i> |
| 37 | Red Indian               | <i>Hap2</i> |
| 38 | Early Blackhull          | <i>Hap2</i> |
| 39 | Nabob                    | <i>Hap2</i> |
| 40 | Cheyenne                 | <i>Hap1</i> |
| 41 | Quivira                  | <i>Hap1</i> |
| 42 | Thatcher                 | <i>Hap2</i> |
| 43 | Rio                      | <i>Hap1</i> |
| 44 | Golden                   | <i>Hap2</i> |
| 45 | Relief                   | <i>Hap1</i> |
| 46 | Nebred                   | <i>Hap1</i> |
| 47 | Wabash                   | <i>Hap1</i> |
| 48 | Ioturk                   | <i>Hap2</i> |
| 49 | Lemhi                    | <i>Hap1</i> |
| 50 | Pilot                    | <i>Hap1</i> |

|    |             |             |
|----|-------------|-------------|
| 51 | Marmin      | <i>Hap1</i> |
| 52 | Enid        | <i>Hap2</i> |
| 53 | Baldrock    | <i>Hap2</i> |
| 54 | Utah Kanred | <i>Hap1</i> |
| 55 | Pawnee      | <i>Hap1</i> |
| 56 | Comanche    | <i>Hap2</i> |
| 57 | Thorne      | <i>Hap2</i> |
| 58 | Marfed      | <i>Hap2</i> |
| 59 | Mida        | <i>Hap1</i> |
| 60 | Cadet       | <i>Hap1</i> |
| 61 | Westar      | <i>Hap1</i> |
| 62 | Ponca       | <i>Hap2</i> |
| 63 | Triumph     | <i>Hap1</i> |
| 64 | Kiowa       | <i>Hap1</i> |
| 65 | Minter      | <i>Hap1</i> |
| 66 | Sioux       | <i>Hap1</i> |
| 67 | Quanah      | <i>Hap3</i> |
| 68 | Blackhawk   | <i>Hap1</i> |
| 69 | Chancellor  | <i>Hap1</i> |
| 70 | Austin      | <i>Hap2</i> |
| 71 | Brevor      | <i>Hap2</i> |
| 72 | Ramona 50   | <i>Hap2</i> |
| 73 | Nured       | <i>Hap1</i> |
| 74 | Taylor      | <i>Hap2</i> |
| 75 | Russell     |             |
| 76 | Lee         | <i>Hap2</i> |
| 77 | Concho      | <i>Hap1</i> |
| 78 | Bison       | <i>Hap1</i> |
| 79 | Butler      | <i>Hap2</i> |
| 80 | Seneca      | <i>Hap2</i> |
| 81 | Atlas 50    | <i>Hap1</i> |
| 82 | LaPorte     | <i>Hap2</i> |
| 83 | Atlas 66    | <i>Hap2</i> |
| 84 | Coker 47-27 | <i>Hap1</i> |
| 85 | Genesee     | <i>Hap1</i> |
| 86 | Saline      |             |
| 87 | Vermillion  | <i>Hap1</i> |
| 88 | Tayland     | <i>Hap2</i> |
| 89 | Westmont    | <i>Hap1</i> |
| 90 | Itana       | <i>Hap1</i> |
| 91 | Centana     | <i>Hap2</i> |
| 92 | Tascosa     | <i>Hap2</i> |
| 93 | Onas 53     | <i>Hap1</i> |
| 94 | Dual        | <i>Hap1</i> |

|     |              |             |
|-----|--------------|-------------|
| 95  | Conley       | <i>Hap1</i> |
| 96  | Racine       | <i>Hap1</i> |
| 97  | Warrior      | <i>Hap2</i> |
| 98  | Taylor 49    | <i>Hap1</i> |
| 99  | Monon        | <i>Hap1</i> |
| 100 | Georgia 1123 |             |
| 101 | Wakeland     | <i>Hap1</i> |
| 102 | Ace          | <i>Hap2</i> |
| 103 | Delmar       | <i>Hap1</i> |
| 104 | Gaines       | <i>Hap1</i> |
| 105 | Avon         | <i>Hap1</i> |
| 106 | Reed         | <i>Hap1</i> |
| 107 | Hume         | <i>Hap1</i> |
| 108 | Gage         | <i>Hap1</i> |
| 109 | Caddo        | <i>Hap1</i> |
| 110 | Scout        | <i>Hap1</i> |
| 111 | Triumph 64   | <i>Hap2</i> |
| 112 | Sturdy       | <i>Hap1</i> |
| 113 | Moro         | <i>Hap2</i> |
| 114 | Polk         | <i>Hap1</i> |
| 115 | Timwin       | <i>Hap2</i> |
| 116 | Wanser       | <i>Hap1</i> |
| 117 | Guide        | <i>Hap1</i> |
| 118 | Fletcher     | <i>Hap1</i> |
| 119 | Era          | <i>Hap1</i> |
| 120 | Scout 66     | <i>Hap2</i> |
| 121 | Trader       | <i>Hap1</i> |
| 122 | Trapper      | <i>Hap2</i> |
| 123 | Kenosha      | <i>Hap2</i> |
| 124 | Yorkstar     | <i>Hap2</i> |
| 125 | Blueboy      | <i>Hap1</i> |
| 126 | Scoutland    | <i>Hap1</i> |
| 127 | Pronto       | <i>Hap1</i> |
| 128 | Logan        | <i>Hap1</i> |
| 129 | Ionia        | <i>Hap2</i> |
| 130 | Paha         | <i>Hap2</i> |
| 131 | Caprock      | <i>Hap2</i> |
| 132 | McDermid     | <i>Hap2</i> |
| 133 | Bridger      | <i>Hap2</i> |
| 134 | Chanute      | <i>Hap2</i> |
| 135 | Satanta      | <i>Hap2</i> |
| 136 | Yukon        | <i>Hap2</i> |
| 137 | Luke         | <i>Hap2</i> |
| 138 | Centurk      | <i>Hap1</i> |



|     |                |             |
|-----|----------------|-------------|
| 139 | Bounty 208     | <i>Hap1</i> |
| 140 | Shortana       | <i>Hap2</i> |
| 141 | Blueboy II     | <i>Hap1</i> |
| 142 | Anza           | <i>Hap1</i> |
| 143 | Potomac        | <i>Hap1</i> |
| 144 | Ranger         | <i>Hap1</i> |
| 145 | Sprague        | <i>Hap1</i> |
| 146 | Baca           | <i>Hap1</i> |
| 147 | Oasis          | <i>Hap3</i> |
| 148 | Hiplains       | <i>Hap1</i> |
| 149 | Buckskin       | <i>Hap1</i> |
| 150 | Cloud          |             |
| 151 | Sage           | <i>Hap1</i> |
| 152 | Ticonderoga    | <i>Hap1</i> |
| 153 | Gent           | <i>Hap1</i> |
| 154 | Lancota        | <i>Hap1</i> |
| 155 | Newana         | <i>Hap2</i> |
| 156 | Roughrider     | <i>Hap2</i> |
| 157 | Agate          | <i>Hap1</i> |
| 158 | Rall           | <i>Hap2</i> |
| 159 | Larned         | <i>Hap2</i> |
| 160 | Arbon          | <i>Hap1</i> |
| 161 | Tyee           | <i>Hap1</i> |
| 162 | TAM 105        | <i>Hap2</i> |
| 163 | Pike           | <i>Hap1</i> |
| 164 | Tyler          | <i>Hap2</i> |
| 165 | Arkan          | <i>Hap1</i> |
| 166 | TAM 107        | <i>Hap1</i> |
| 167 | TAM 108        | <i>Hap2</i> |
| 168 | Kitt           | <i>Hap2</i> |
| 169 | Huron          | <i>Hap1</i> |
| 170 | Preston        | <i>Hap2</i> |
| 171 | Dawson         | <i>Hap1</i> |
| 172 | Marquis        | <i>Hap1</i> |
| 173 | Prelude        | <i>Hap1</i> |
| 174 | Pioneer        | <i>Hap1</i> |
| 175 | White Fife     | <i>Hap1</i> |
| 176 | Stanley        | <i>Hap1</i> |
| 177 | Kitchener      | <i>Hap1</i> |
| 178 | Early Red Fife | <i>Hap1</i> |
| 179 | Ruby           | <i>Hap1</i> |
| 180 | Nebraska No. 6 | <i>Hap1</i> |
| 181 | Red Bobs       | <i>Hap1</i> |
| 182 | Sea Island     | <i>Hap1</i> |

|     |                    |             |
|-----|--------------------|-------------|
| 183 | Kharkov MC22       | <i>Hap2</i> |
| 184 | Oregon Zimmerman   | <i>Hap2</i> |
| 185 | Supreme            | <i>Hap2</i> |
| 186 | Reward             | <i>Hap1</i> |
| 187 | Renfrew            | <i>Hap1</i> |
| 188 | Axminster          | <i>Hap1</i> |
| 189 | Escondido          | <i>Hap2</i> |
| 190 | Ramona             | <i>Hap2</i> |
| 191 | Arco               | <i>Hap1</i> |
| 192 | Hard Federation 31 | <i>Hap2</i> |
| 193 | Berkeley Rock      | <i>Hap1</i> |
| 194 | Powerclub          | <i>Hap1</i> |
| 195 | Whiteman           | <i>Hap1</i> |
| 196 | Clarkan            | <i>Hap1</i> |
| 197 | Eagle Chief        | <i>Hap2</i> |
| 198 | Hyper              | <i>Hap2</i> |
| 199 | Marvel             | <i>Hap1</i> |
| 200 | Montana King       | <i>Hap1</i> |
| 201 | Poso               | <i>Hap1</i> |
| 202 | Redhart            | <i>Hap2</i> |
| 203 | Missouri Valley    | <i>Hap3</i> |
| 204 | V.P.I. 131         |             |
| 205 | V.P.I. 112         | <i>Hap1</i> |
| 206 | Hood               | <i>Hap1</i> |
| 207 | Comet              | <i>Hap1</i> |
| 208 | Coronation         | <i>Hap1</i> |
| 209 | Kruse              | <i>Hap1</i> |
| 210 | Redhull            | <i>Hap1</i> |
| 211 | Genro              | <i>Hap1</i> |
| 212 | Erect              | <i>Hap1</i> |
| 213 | Hymar              | <i>Hap2</i> |
| 214 | Renown             | <i>Hap1</i> |
| 215 | Apex               | <i>Hap1</i> |
| 216 | Rival              | <i>Hap1</i> |
| 217 | Regent             | <i>Hap1</i> |
| 218 | Orfed              | <i>Hap1</i> |
| 219 | Fairfield          | <i>Hap1</i> |
| 220 | Sanford            | <i>Hap1</i> |
| 221 | Newthatch          | <i>Hap1</i> |
| 222 | Cascade            | <i>Hap1</i> |
| 223 | Rescue             | <i>Hap1</i> |
| 224 | Saunders           | <i>Hap1</i> |
| 225 | Redman             | <i>Hap1</i> |
| 226 | Selkirk            | <i>Hap1</i> |

|     |             |             |
|-----|-------------|-------------|
| 227 | Chinook     | <i>Hap1</i> |
| 228 | Kenhi       | <i>Hap2</i> |
| 229 | Pembina     | <i>Hap2</i> |
| 230 | Cypress     | <i>Hap1</i> |
| 231 | Canthatch   | <i>Hap2</i> |
| 232 | Lake        | <i>Hap1</i> |
| 233 | Winalta     | <i>Hap2</i> |
| 234 | Manitou     | <i>Hap1</i> |
| 235 | Talbot      | <i>Hap2</i> |
| 236 | Park        | <i>Hap2</i> |
| 237 | Neepawa     | <i>Hap1</i> |
| 238 | McNair 1813 | <i>Hap1</i> |
| 239 | Sundance    | <i>Hap1</i> |
| 240 | Inia 66R    | <i>Hap2</i> |
| 241 | Canuck      | <i>Hap2</i> |
| 242 | Yecora Rojo |             |
| 243 | Portola     | <i>Hap1</i> |
| 244 | Downy       |             |
| 245 | Sinton      |             |
| 246 | Rosen       |             |
| 247 | Shasta      | <i>Hap1</i> |
| 248 | Roland      | <i>Hap1</i> |
| 249 | Payne       | <i>Hap2</i> |
| 250 | Omega 78    | <i>Hap1</i> |
| 251 | Bennett     | <i>Hap1</i> |
| 252 | Centurk 78  | <i>Hap1</i> |
| 253 | Maverick    | <i>Hap1</i> |
| 254 | Texred      | <i>Hap2</i> |
| 255 | Norstar     | <i>Hap2</i> |
| 256 | Dirkwin     | <i>Hap2</i> |
| 257 | Powell      | <i>Hap1</i> |
| 258 | Nelson      | <i>Hap2</i> |
| 259 | Purcell     | <i>Hap2</i> |
| 260 | James       | <i>Hap1</i> |
| 261 | Rose        | <i>Hap1</i> |
| 262 | Rita        | <i>Hap2</i> |
| 263 | Dawn        | <i>Hap1</i> |
| 264 | Nell        | <i>Hap2</i> |
| 265 | TAM 106     | <i>Hap2</i> |
| 266 | Pondera     | <i>Hap2</i> |
| 267 | Frankenmuth | <i>Hap1</i> |
| 268 | Augusta     | <i>Hap1</i> |
| 269 | Redwin      | <i>Hap1</i> |
| 270 | Manning     | <i>Hap1</i> |

|     |             |             |
|-----|-------------|-------------|
| 271 | Crestone    | <i>Hap2</i> |
| 272 | Sterling    | <i>Hap2</i> |
| 273 | Neeley      | <i>Hap1</i> |
| 274 | Stacy       | <i>Hap2</i> |
| 275 | Wings       | <i>Hap1</i> |
| 276 | Tamex       | <i>Hap2</i> |
| 277 | Mit         | <i>Hap2</i> |
| 278 | Caldwell    | <i>Hap1</i> |
| 279 | Auburn      | <i>Hap1</i> |
| 280 | Wheeler     | <i>Hap2</i> |
| 281 | Winridge    | <i>Hap1</i> |
| 282 | McKay       | <i>Hap1</i> |
| 283 | Owens       | <i>Hap1</i> |
| 284 | Lewjain     | <i>Hap2</i> |
| 285 | Tres        | <i>Hap2</i> |
| 286 | Marshall    | <i>Hap2</i> |
| 287 | Guard       | <i>Hap1</i> |
| 288 | Centa       | <i>Hap2</i> |
| 289 | Severn      | <i>Hap2</i> |
| 290 | Crew        | <i>Hap2</i> |
| 291 | Massey      | <i>Hap2</i> |
| 292 | Hill 81     | <i>Hap1</i> |
| 293 | Phoenix     | <i>Hap1</i> |
| 294 | Brule       | <i>Hap1</i> |
| 295 | Treasure    | <i>Hap1</i> |
| 296 | Wheaton     | <i>Hap1</i> |
| 297 | Fillmore    | <i>Hap1</i> |
| 298 | Scotty      | <i>Hap2</i> |
| 299 | Bradford    | <i>Hap2</i> |
| 300 | Susquehanna | <i>Hap1</i> |
| 301 | Centura     | <i>Hap1</i> |
| 302 | Colt        | <i>Hap1</i> |
| 303 | Agassiz     | <i>Hap1</i> |
| 304 | Compton     | <i>Hap2</i> |
| 305 | Saluda      | <i>Hap2</i> |
| 306 | Adena       | <i>Hap1</i> |
| 307 | Glenman     | <i>Hap1</i> |
| 308 | Siouxland   | <i>Hap1</i> |
| 309 | Cody        | <i>Hap1</i> |
| 310 | Chisholm    | <i>Hap1</i> |
| 311 | Bliss       | <i>Hap2</i> |
| 312 | Dusty       | <i>Hap2</i> |
| 313 | Hillsdale   | <i>Hap2</i> |
| 314 | Ute         | <i>Hap1</i> |

|     |          |             |
|-----|----------|-------------|
| 315 | Adder    | <i>Hap2</i> |
| 316 | Cree     | <i>Hap1</i> |
| 317 | Norwin   | <i>Hap2</i> |
| 318 | Prospect | <i>Hap2</i> |
| 319 | Shield   | <i>Hap1</i> |
| 320 | Tadinia  | <i>Hap1</i> |
| 321 | Becker   | <i>Hap2</i> |
| 322 | Batum    | <i>Hap1</i> |
| 323 | Leader   | <i>Hap1</i> |
| 324 | Blanca   | <i>Hap1</i> |
| 325 | Copper   | <i>Hap1</i> |
| 326 | Redland  | <i>Hap2</i> |
| 327 | Century  | <i>Hap1</i> |
| 328 | Cardinal | <i>Hap1</i> |
| 329 | Geneva   | <i>Hap1</i> |
| 330 | Dodge    | <i>Hap1</i> |
| 331 | Norkan   | <i>Hap1</i> |
| 332 | Dynasty  | <i>Hap1</i> |
| 333 | Williams | <i>Hap2</i> |
| 334 | Lancer   | <i>Hap2</i> |
| 335 | GR855    | <i>Hap1</i> |
| 336 | GR863    | <i>Hap2</i> |
| 337 | GR860    | <i>Hap2</i> |
| 338 | Seward   | <i>Hap1</i> |
| 339 | Survivor | <i>Hap2</i> |
| 340 | Madsen   | <i>Hap1</i> |
| 341 | Hyak     | <i>Hap1</i> |
| 342 | Collin   | <i>Hap2</i> |
| 343 | Andrews  | <i>Hap2</i> |
| 344 | Blizzard | <i>Hap1</i> |
| 345 | Clark    | <i>Hap2</i> |
| 346 | Oveson   | <i>Hap2</i> |
| 347 | GR876    | <i>Hap2</i> |
| 348 | Keiser   | <i>Hap2</i> |
| 349 | Tiber    | <i>Hap1</i> |
| 350 | Arapahoe | <i>Hap2</i> |
| 351 | Laura    | <i>Hap2</i> |
| 352 | Marberg  | <i>Hap2</i> |
| 353 | Karl     | <i>Hap2</i> |
| 354 | Minnpro  | <i>Hap2</i> |
| 355 | Vance    | <i>Hap2</i> |
| 356 | 2548     | <i>Hap1</i> |
| 357 | 2555     | <i>Hap1</i> |
| 358 | Buchanan | <i>Hap1</i> |

|     |             |             |
|-----|-------------|-------------|
| 359 | Eltan       | <i>Hap2</i> |
| 360 | Kmor        | <i>Hap1</i> |
| 361 | Centennial  | <i>Hap2</i> |
| 362 | SWS-52      | <i>Hap1</i> |
| 363 | Georgia 100 | <i>Hap2</i> |
| 364 | Sharp       | <i>Hap1</i> |
| 365 | Rely        | <i>Hap1</i> |
| 366 | Rawhide     |             |
| 367 | Vandal      | <i>Hap1</i> |
| 368 | Wakefield   | <i>Hap1</i> |
| 369 | Madison     | <i>Hap1</i> |
| 370 | Verne       | <i>Hap1</i> |
| 371 | Hi-Line     | <i>Hap1</i> |
| 372 | Howell      | <i>Hap1</i> |
| 373 | McNair 1003 | <i>Hap2</i> |
| 374 | TAM 109     | <i>Hap2</i> |
| 375 | Promontory  | <i>Hap2</i> |
| 376 | Excel       | <i>Hap2</i> |
| 377 | Fairview    | <i>Hap1</i> |
| 378 | Rod         | <i>Hap2</i> |
| 379 | Hoff        | <i>Hap1</i> |
| 380 | Gene        | <i>Hap1</i> |
| 381 | AC Reed     | <i>Hap2</i> |
| 382 | GA-Gore     | <i>Hap1</i> |
| 383 | GA-Andy     | <i>Hap1</i> |
| 384 | GR915       | <i>Hap1</i> |
| 385 | Vista       | <i>Hap1</i> |
| 386 | Erhardt     | <i>Hap2</i> |
| 387 | Jules       | <i>Hap2</i> |
| 388 | AC Taber    | <i>Hap1</i> |
| 389 | Alliance    | <i>Hap1</i> |
| 390 | McNeal      | <i>Hap1</i> |
| 391 | TAM-200     | <i>Hap1</i> |
| 392 | TAM-201     | <i>Hap1</i> |
| 393 | Sylvan      | <i>Hap1</i> |
| 394 | Lambert     | <i>Hap2</i> |
| 395 | AC Michael  | <i>Hap2</i> |
| 396 | Akron       | <i>Hap2</i> |
| 397 | Halt        | <i>Hap2</i> |
| 398 | Judith      | <i>Hap1</i> |
| 399 | Niobrara    | <i>Hap1</i> |
| 400 | Nekota      | <i>Hap2</i> |
| 401 | Clemson 201 | <i>Hap2</i> |
| 402 | IL 84-4046  | <i>Hap2</i> |

|     |              |             |
|-----|--------------|-------------|
| 403 | IL 85-3132-1 | <i>Hap2</i> |
| 404 | Finley       | <i>Hap2</i> |
| 405 | Hiller       | <i>Hap1</i> |
| 406 | Hazen        | <i>Hap2</i> |
| 407 | USU-Apogee   |             |
| 408 | Glory        | <i>Hap2</i> |
| 409 | Whitebird    | <i>Hap1</i> |
| 410 | Pomerelle    | <i>Hap2</i> |
| 411 | Pronghorn    | <i>Hap1</i> |
| 412 | AC Barrie    | <i>Hap2</i> |
| 413 | AC Karma     | <i>Hap1</i> |
| 414 | Rampart      | <i>Hap2</i> |
| 415 | McGuire      | <i>Hap2</i> |
| 416 | Vanguard     | <i>Hap2</i> |
| 417 | Coda         | <i>Hap2</i> |
| 418 | Utah-100     | <i>Hap1</i> |
| 419 | NY Batavia   | <i>Hap1</i> |
| 420 | Cayuga       | <i>Hap1</i> |
| 421 | BacUp        | <i>Hap1</i> |
| 422 | Windstar     | <i>Hap1</i> |
| 423 | Boundary     | <i>Hap2</i> |
| 424 | Jefferson    | <i>Hap2</i> |
| 425 | AC Nanda     | <i>Hap1</i> |
| 426 | AC Phil      | <i>Hap1</i> |
| 427 | Yumar        | <i>Hap1</i> |
| 428 | Prowers      | <i>Hap1</i> |
| 429 | Prairie Red  | <i>Hap1</i> |
| 430 | Wesley       | <i>Hap1</i> |
| 431 | Culver       | <i>Hap1</i> |
| 432 | Edwin        | <i>Hap2</i> |
| 433 | Hayden       | <i>Hap2</i> |
| 434 | Harding      | <i>Hap2</i> |
| 435 | Caledonia    |             |
| 436 | KY 86C-61-8  | <i>Hap1</i> |
| 437 | Prowers 99   | <i>Hap2</i> |
| 438 | Cougar       | <i>Hap1</i> |
| 439 | Millennium   | <i>Hap1</i> |
| 440 | Rick         | <i>Hap1</i> |
| 441 | Wynne        | <i>Hap1</i> |
| 442 | Jubilee      | <i>Hap1</i> |
| 443 | Lolo         | <i>Hap1</i> |
| 444 | Iona         | <i>Hap2</i> |
| 445 | Wahoo        | <i>Hap1</i> |
| 446 | NuSky        | <i>Hap1</i> |

|     |               |             |
|-----|---------------|-------------|
| 447 | Avalanche     | <i>Hap1</i> |
| 448 | Finch         | <i>Hap2</i> |
| 449 | Intrada       | <i>Hap1</i> |
| 450 | Deloris       | <i>Hap2</i> |
| 451 | Ok101         | <i>Hap1</i> |
| 452 | Ankor         | <i>Hap1</i> |
| 453 | Richland      | <i>Hap2</i> |
| 454 | Jerry         | <i>Hap2</i> |
| 455 | Goodstreak    |             |
| 456 | Harry         | <i>Hap1</i> |
| 457 | Ok102         | <i>Hap1</i> |
| 458 | Hollis        | <i>Hap1</i> |
| 459 | AC Andrew     | <i>Hap2</i> |
| 460 | Antelope      | <i>Hap2</i> |
| 461 | Arrowsmith    | <i>Hap1</i> |
| 462 | AR 910        | <i>Hap2</i> |
| 463 | Hatcher       | <i>Hap1</i> |
| 464 | Hallam        | <i>Hap1</i> |
| 465 | Choptank      | <i>Hap1</i> |
| 466 | Juniper       | <i>Hap1</i> |
| 467 | UI Darwin     | <i>Hap1</i> |
| 468 | Paul          | <i>Hap1</i> |
| 469 | Allegiance    | <i>Hap1</i> |
| 470 | Cataldo       | <i>Hap1</i> |
| 471 | UI Winchester | <i>Hap1</i> |
| 472 | Bess          | <i>Hap1</i> |
| 473 | Chesapeake    | <i>Hap1</i> |
| 474 | NE01643       | <i>Hap1</i> |
| 475 | Mace          | <i>Hap2</i> |
| 476 | Camelot       | <i>Hap2</i> |
| 477 | Willow Creek  | <i>Hap1</i> |
| 478 | Alson         | <i>Hap1</i> |
| 479 | Steel-ND      | <i>Hap1</i> |
| 480 | Faller        | <i>Hap2</i> |

---

**Former USSR varieties**

|   |         |             |
|---|---------|-------------|
| 1 | L21     | <i>Hap2</i> |
| 2 | L28     | <i>Hap3</i> |
| 3 | Φ2a     | <i>Hap2</i> |
| 4 | Φ3a     | <i>Hap1</i> |
| 5 | G7      | <i>Hap3</i> |
| 6 | G14     | <i>Hap3</i> |
| 7 | B55     | <i>Hap2</i> |
| 8 | D35     | <i>Hap3</i> |
| 9 | Ак-Урук | <i>Hap2</i> |



|    |                    |             |
|----|--------------------|-------------|
| 10 | Чуониозюахоп       | <i>Нар3</i> |
| 11 | Zунюодахапиаи      | <i>Нар3</i> |
| 12 | Lvrin 37           | <i>Нар2</i> |
| 13 | Vilmorin 30        | <i>Нар1</i> |
| 14 | Волгоградская      | <i>Нар2</i> |
| 15 | Vencubbin/s        | <i>Нар2</i> |
| 16 | Сорт-2             | <i>Нар1</i> |
| 17 | Зерноградкая       | <i>Нар2</i> |
| 18 | Зимородок          | <i>Нар1</i> |
| 19 | Багра              | <i>Нар1</i> |
| 20 | Багра              | <i>Нар2</i> |
| 21 | Казанская 84       | <i>Нар2</i> |
| 22 | Сая 95009          | <i>Нар1</i> |
| 23 | Danchi Komugi      | <i>Нар2</i> |
| 24 | Gabo               | <i>Нар2</i> |
| 25 | Gabo-2             | <i>Нар2</i> |
| 26 | Gabo-3             | <i>Нар2</i> |
| 27 | Ellysee/s          | <i>Нар2</i> |
| 28 | Эритроспермум 7291 | <i>Нар2</i> |
| 29 | Тарасовская 61     | <i>Нар2</i> |
| 30 | Куйбышевка         | <i>Нар2</i> |
| 31 | Черноземка 153     | <i>Нар2</i> |
| 32 | Югтина             | <i>Нар1</i> |
| 33 | A33                | <i>Нар2</i> |
| 34 | Багра-9            | <i>Нар2</i> |
| 35 | Сорт-1             | <i>Нар2</i> |
| 36 | Erytrospermum 81   | <i>Нар2</i> |
| 37 | Безостая 2         | <i>Нар2</i> |
| 38 | Тор/s              | <i>Нар1</i> |
| 39 | Wim                | <i>Нар2</i> |
| 40 | Danchi Komugi/t    | <i>Нар3</i> |
| 41 | Лютесценс 329      | <i>Нар2</i> |
| 42 | Landrace           | <i>Нар2</i> |
| 43 | Landrace           | <i>Нар1</i> |
| 44 | Vencubbin/wt       | <i>Нар2</i> |
| 45 | Gabo               | <i>Нар2</i> |
| 46 | Донская юбилейная  | <i>Нар2</i> |
| 47 | Сибирская Нива     | <i>Нар2</i> |
| 48 | Даха               | <i>Нар2</i> |
| 49 | Бугдай             | <i>Нар2</i> |
| 50 | Банаткя            | <i>Нар3</i> |
| 51 | Gaba-1             | <i>Нар2</i> |
| 52 | Крымская.обл.      | <i>Нар2</i> |
| 53 | Сандомирка         | <i>Нар2</i> |

|    |                     |             |
|----|---------------------|-------------|
| 54 | Lvrin 36            | <i>Hap2</i> |
| 55 | Vilmorin 30         | <i>Hap2</i> |
| 56 | Волгоградская 84    | <i>Hap2</i> |
| 57 | Краснодарская 39    | <i>Hap2</i> |
| 58 | Мироновская 28      | <i>Hap2</i> |
| 59 | Сандомирка          | <i>Hap2</i> |
| 60 | A06/w               | <i>Hap2</i> |
| 61 | АНВхой11/s          | <i>Hap2</i> |
| 62 | Local               | <i>Hap1</i> |
| 63 | Local               |             |
| 64 | Kavkaz              |             |
| 65 | Ablaca              |             |
| 66 | Wheaton             | <i>Hap1</i> |
| 67 | Прпобокя            | <i>Hap2</i> |
| 68 | Cabezorro III       | <i>Hap1</i> |
| 69 | Liviongston         | <i>Hap2</i> |
| 70 | E68                 | <i>Hap2</i> |
| 71 | S5                  | <i>Hap3</i> |
| 72 | H3(a)1              | <i>Hap1</i> |
| 73 | Саратовская 51      | <i>Hap2</i> |
| 74 | Боливия             | <i>Hap1</i> |
| 75 | Бурятская           | <i>Hap1</i> |
| 76 | Erythrospermum 59/r | <i>Hap1</i> |
| 77 | Norm                | <i>Hap1</i> |
| 78 | Yuriya 79           | <i>Hap2</i> |
| 79 | Red River           | <i>Hap2</i> |
| 80 | Ablaca-3            | <i>Hap2</i> |
| 81 | Wheaton-1           | <i>Hap2</i> |
| 82 | Yuriya 80           | <i>Hap2</i> |
| 83 | Fortuna/t           | <i>Hap1</i> |

---

**CIMMYT varieties**

|    |                    |             |
|----|--------------------|-------------|
| 1  | YAQUI 48           |             |
| 2  | LERMA 50           | <i>Hap2</i> |
| 3  | GABO 54            | <i>Hap2</i> |
| 4  | PENJAMO T 62       | <i>Hap2</i> |
| 5  | PITIC S62          | <i>Hap2</i> |
| 6  | NADADORES M 63     | <i>Hap2</i> |
| 7  | LERMA ROJO 64      | <i>Hap3</i> |
| 8  | SONORA 64          | <i>Hap2</i> |
| 9  | INIA F 66          | <i>Hap2</i> |
| 10 | SIETE CERROS T66   | <i>Hap2</i> |
| 11 | SONALIKA           |             |
| 12 | YECORA F 70        | <i>Hap2</i> |
| 13 | MARCOS JUAREZ INTA |             |

|    |                       |             |
|----|-----------------------|-------------|
| 14 | ANZA                  | <i>Hap2</i> |
| 15 | JUPATECO F 73         | <i>Hap2</i> |
| 16 | NACOZARI F 76         | <i>Hap2</i> |
| 17 | PAVON F 76            | <i>Hap1</i> |
| 18 | CIANO T 79            | <i>Hap2</i> |
| 19 | SERI M 82             | <i>Hap2</i> |
| 20 | PUNJAB 85             | <i>Hap2</i> |
| 21 | DON ERNESTO INTA      | <i>Hap2</i> |
| 22 | BACANORA T 88         | <i>Hap2</i> |
| 23 | CUMPAS T 88           | <i>Hap2</i> |
| 24 | NESSER                | <i>Hap2</i> |
| 25 | BAVIACORA M 92        | <i>Hap2</i> |
| 26 | SUPER KAUZ            | <i>Hap2</i> |
| 27 | MISR 1                | <i>Hap2</i> |
| 28 | EMBRAPA 16            | <i>Hap1</i> |
| 29 | KINGBIRD #1           | <i>Hap1</i> |
| 30 | THELIN#2/TUKURU       | <i>Hap2</i> |
| 31 | BABAX/LR42            | <i>Hap2</i> |
| 32 | ND643/2*WBLL1         | <i>Hap2</i> |
| 33 | ND643/2*WBLL1         | <i>Hap2</i> |
| 34 | DANPHE #1             | <i>Hap2</i> |
| 35 | PICAFLORE #1          | <i>Hap2</i> |
| 36 | YANAC/3/PARULA        | <i>Hap1</i> |
| 37 | SHANGHAI#7            | <i>Hap2</i> |
| 38 | QUAIU                 | <i>Hap2</i> |
| 39 | PARULA/2 PASTOR       | <i>Hap2</i> |
| 40 | NELOKI                | <i>Hap2</i> |
| 41 | HUW234+LR34/PRINIA    | <i>Hap1</i> |
| 42 | WHEATEAR/SOKOLL       | <i>Hap1</i> |
| 43 | FRET2*2/4/SONOITA F   | <i>Hap2</i> |
| 44 | PBW343*2/KUKUNA       | <i>Hap2</i> |
| 45 | WEEBILL1*2/BRAM       | <i>Hap1</i> |
| 46 | ALTAR 84/AE.SQUARROSA | <i>Hap1</i> |
| 47 | UP2338*2/4/SONOITA    | <i>Hap1</i> |
| 48 | PARUS/FRANCOLIN #1    | <i>Hap2</i> |
| 49 | PFAU/SERI.1B//AMADINA | <i>Hap1</i> |
| 50 | NACOZARI F 76         | <i>Hap2</i> |
| 51 | NACOZARI F 76         | <i>Hap2</i> |
| 52 | ALTAR 84/AE.SQUARROSA | <i>Hap2</i> |
| 53 | PBW343                | <i>Hap2</i> |

---

**Australian varieties**

|   |          |             |
|---|----------|-------------|
| 1 | Crusades | <i>Hap2</i> |
| 2 | Lincolia | <i>Hap2</i> |
| 3 | Dakota   | <i>Hap2</i> |

|    |                 |             |
|----|-----------------|-------------|
| 4  | Bowerbird       | <i>Hap2</i> |
| 5  | Baxter          | <i>Hap2</i> |
| 6  | Wylah           | <i>Hap2</i> |
| 7  | Wilgoyne        | <i>Hap2</i> |
| 8  | Westonia        | <i>Hap2</i> |
| 9  | Ventura         | <i>Hap2</i> |
| 10 | Tasman          | <i>Hap2</i> |
| 11 | Tailorbird      | <i>Hap2</i> |
| 12 | Sunyale         | <i>Hap2</i> |
| 13 | Sunsoft 98      | <i>Hap2</i> |
| 14 | Sunlin          | <i>Hap2</i> |
| 15 | Sunfield        | <i>Hap2</i> |
| 16 | Suneco          | <i>Hap2</i> |
| 17 | Sunbri          | <i>Hap2</i> |
| 18 | Ruby            | <i>Hap2</i> |
| 19 | Sapphire        | <i>Hap2</i> |
| 20 | Petrie          | <i>Hap2</i> |
| 21 | Rubric          | <i>Hap1</i> |
| 22 | Roselia         | <i>Hap2</i> |
| 23 | Perenjori       | <i>Hap2</i> |
| 24 | Mitre           | <i>Hap2</i> |
| 25 | Lorikeet        | <i>Hap2</i> |
| 26 | Leichhardt      | <i>Hap2</i> |
| 27 | Lang            | <i>Hap2</i> |
| 28 | Kukri           | <i>Hap2</i> |
| 29 | Krichauff       | <i>Hap1</i> |
| 30 | Kennedy         | <i>Hap2</i> |
| 31 | Janz            | <i>Hap2</i> |
| 32 | Giles           | <i>Hap2</i> |
| 33 | Prame           | <i>Hap1</i> |
| 34 | Ega Gregory     | <i>Hap2</i> |
| 35 | Ega Binnie Rock | <i>Hap2</i> |
| 36 | Drysdale        | <i>Hap2</i> |
| 37 | Diamondbird     | <i>Hap2</i> |
| 38 | Cunningham      | <i>Hap2</i> |
| 39 | Cunderdin       | <i>Hap2</i> |
| 40 | Cook            | <i>Hap2</i> |
| 41 | Chara           | <i>Hap2</i> |
| 42 | Casades         | <i>Hap2</i> |
| 43 | Carnamah        | <i>Hap2</i> |
| 44 | Carinya         | <i>Hap2</i> |
| 45 | Camm            | <i>Hap2</i> |
| 46 | Calingiri       | <i>Hap2</i> |
| 47 | Cadoux          | <i>Hap2</i> |

|    |          |             |
|----|----------|-------------|
| 48 | Barks    | <i>Hap2</i> |
| 49 | Arrino   | <i>Hap2</i> |
| 50 | Annuello | <i>Hap2</i> |
| 51 | Amery    | <i>Hap2</i> |

---
